# Supplementary material for: Transcriptomics of Hirschsprung disease patient-derived enteric neural crest cells reveals a role for oxidative phosphorylation
Source: PubMed Central journal article supplement (PMC10105741; doi:10.1038/s41467-023-37928-5), 2023-04-15
Supplement: 41467_2023_37928_MOESM1_ESM.pdf [file 41467_2023_37928_MOESM1_ESM.pdf]

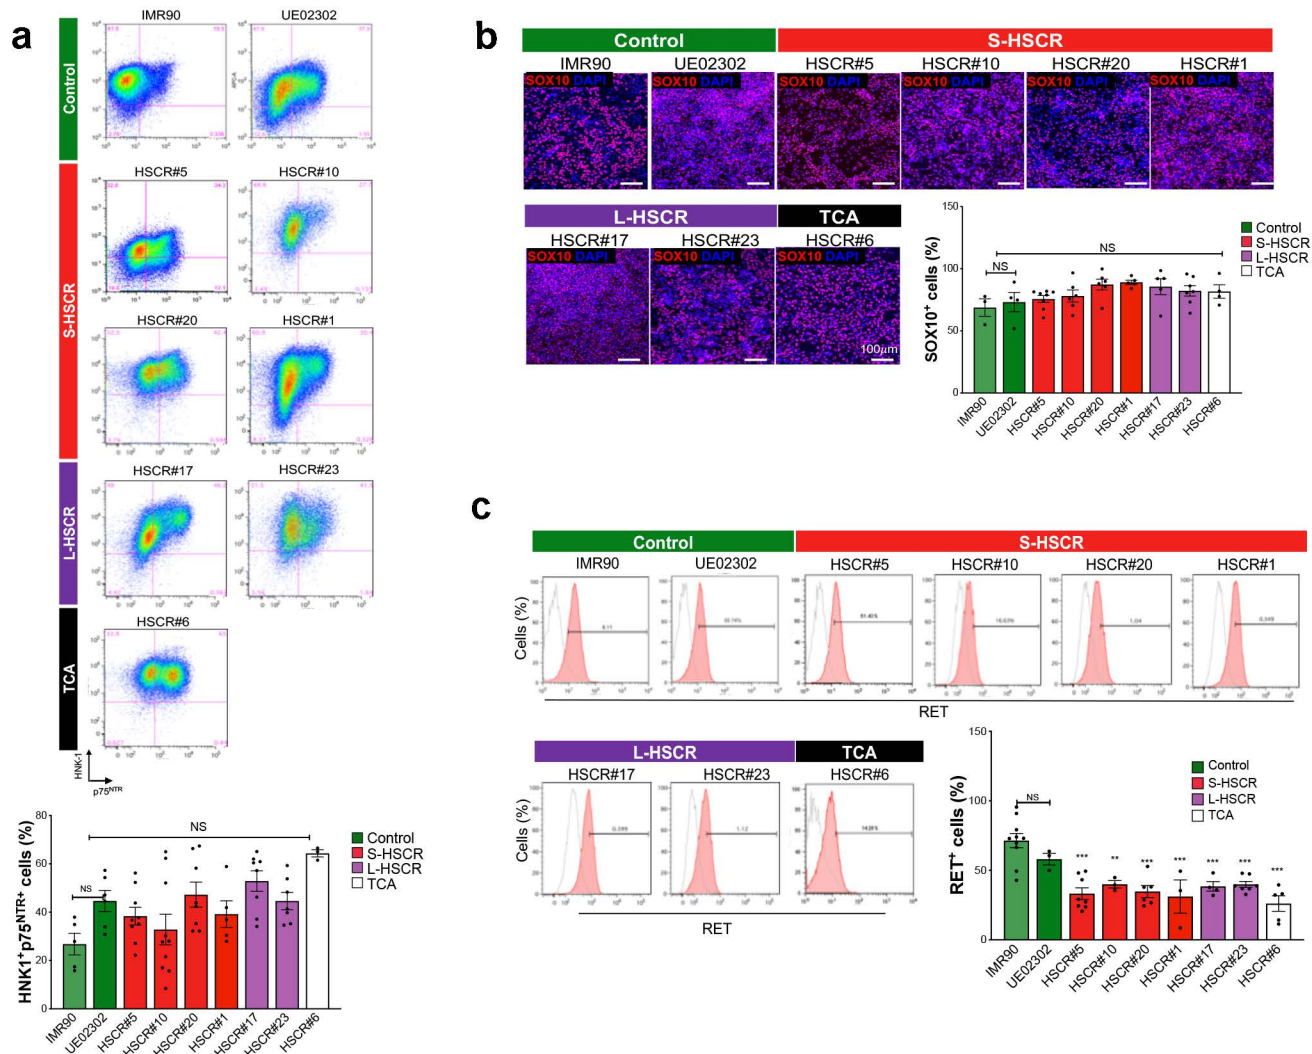

**Supplementary Fig. 1 Characterization of hENCCs derived from control and HSCR-iPSC lines.** Flow cytometry analyses of (a) HNK1<sup>+</sup>p75<sup>NTR+</sup> hENCCs. (b) Immunocytochemistry to detect SOX10 expression in HNK1/p75<sup>NTR</sup> enriched hENCCs. (c) Flow cytometry analyses of RET expression in HNK1<sup>+</sup>p75<sup>NTR+</sup> ENCCs. Charts show the mean values +/- SEM from 3-10 independent experiments. \*\*\* and \*\* represent they are significantly different from the two control of *P*-value <0.001 and <0.01, respectively. NS: not significantly different (2-way ANOVA, Dunnett post test). Source data are provided as a Source Data file.

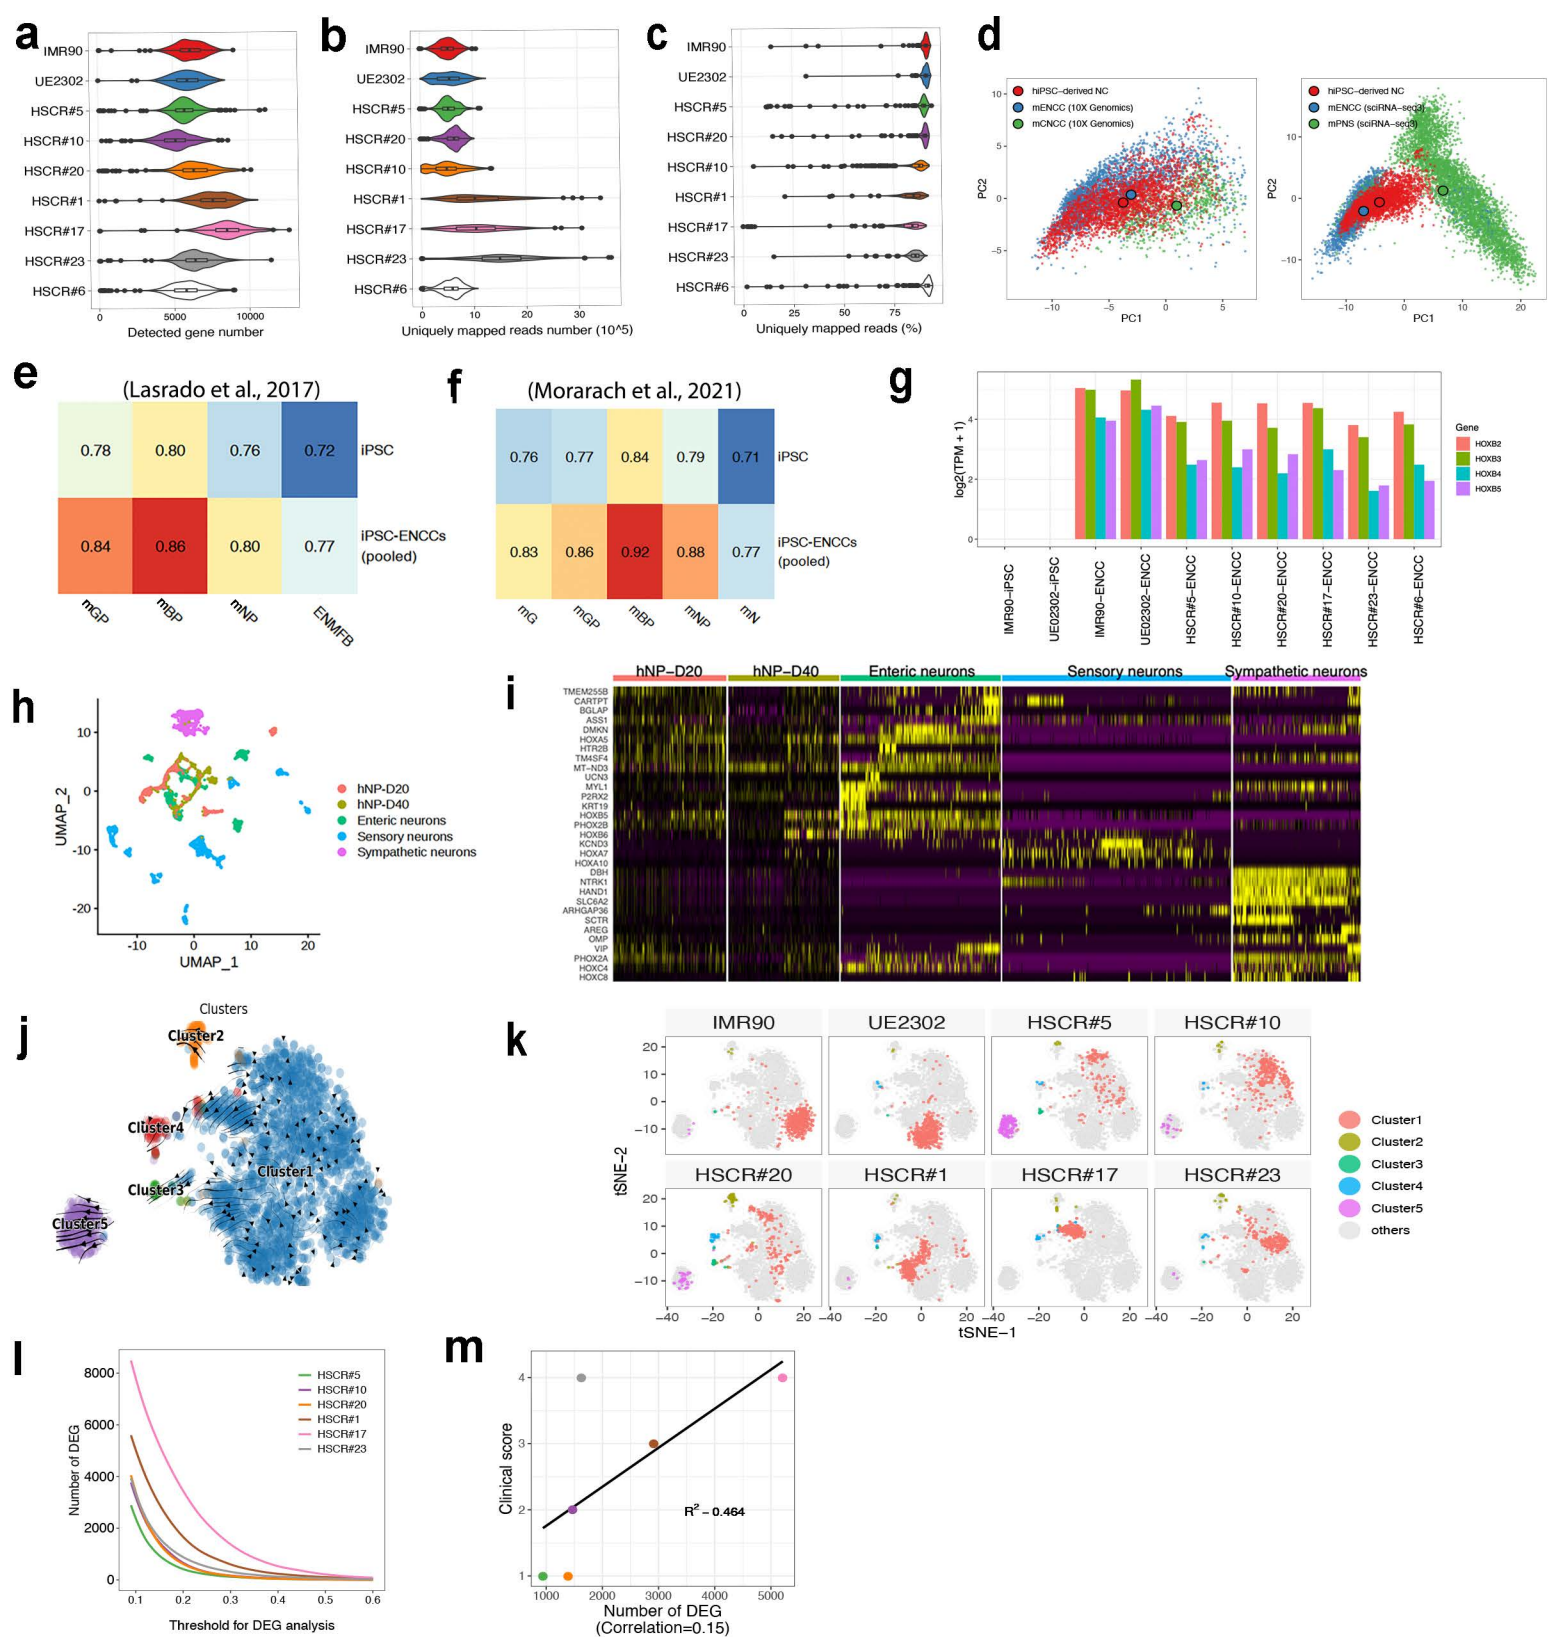

**Supplementary Fig. 2 Quality control and overall characteristics of single-cell RNA-seq dataset.** (a) The numbers of detected genes, (b) uniquely mapped reads and (c) the percentages of uniquely mapped reads of eight sequenced samples. (d) PCA plot shows the similarities between human iPSC-derived NC cells and mouse *in vivo* enteric/non-enteric NC cells at E13.5 from two independent datasets. Colored by cell group. Circled dots with bigger size indicate the average values of each cell group. Sequencing platforms of datasets are noted. Correlation heatmaps show the similarities between hiPSC, iPSC-derived ENCCs, and mouse enteric bipotent progenitors (mBP), glial progenitor (mGP), and mature glial cells (mG), neuronal progenitors (mNP), mature neurons (mN) and enteric mesothelial fibroblast (ENMF8) at (e) E12.5-13<sup>21</sup> and (f) E15.5, E18.5 and P21<sup>24</sup>. (g) Expression of *HOXB2*, *HOXB3*, *HOXB4*, *HOXB5* in ENCCs derived from the control and HSCR-iPSC lines based on the bulk RNAseq data. (h) UMAP analysis comparing the neuronal derivatives of hiPSC-ENCCs (hNP-D20, hNP-4) with mouse enteric, sensory and sympathetic neurons. (i) Heatmap shows the expression of marker genes in the neuronal derivatives of hiPSC-ENCCs (hNP-D20, hNP-4), mouse enteric, sensory and sympathetic neurons, and reveals that hiPSC-ENCCs highly similar to the mouse enteric neurons. (j) Predicted differentiation direction by RNA velocity. (k) Distribution of the cells from each sample in *t*-SNE plot. (l) Changes of numbers of DEGs at different thresholds in different HSCR-ENCCs. (m) Correlation between the number of DEG and clinical score among the six HSCR samples. R squared (R<sup>2</sup>) between number of DEGs and clinical score is calculated as the square of their correlation. In all the violin plots, each violin represents the kernel probability density of the data at different values. An inner boxplot indicates the interquartile range (IQR, the range between the 25th and 75th percentile) with the mid-point of the data.

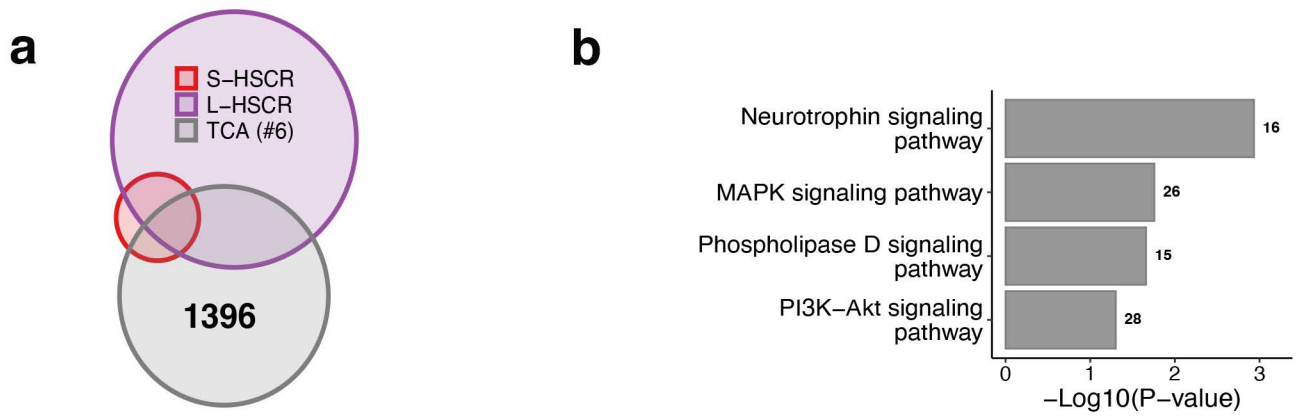

**Supplementary Fig. 3 DEGs and pathways uniquely disrupted in TCA-ENCCs.** (a) Venn plot shows the 1396 unique DEGs in TCA-ENCCs (HSCR#6) compared to S- and L-HSCR-ENCCs, (b) KEGG pathway enrichment analysis of DEGs uniquely identified in TCA-ENCCs. *P*-value and FDR were calculated by clusterProfiler software.

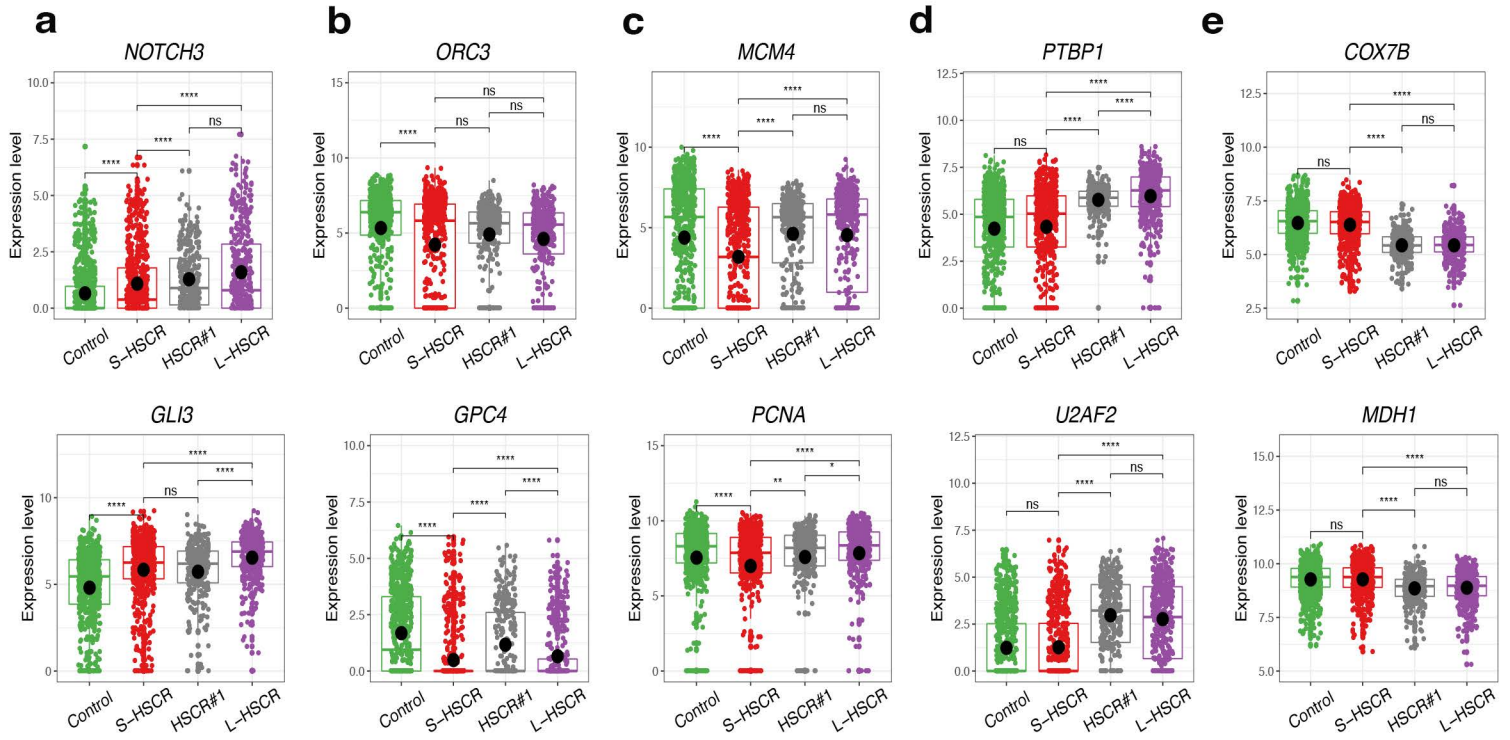

**Supplementary Fig. 4 Expressions of representative genes in various cellular pathways.** Representative genes of **(a)** negative regulation of neurogenesis, **(b)** synapse organization, **(c)** proliferation, **(d)** RNA splicing and **(e)** energy metabolism. Two-sided Wilcoxon rank-sum test was applied to calculate the significance of difference between two groups. All samples (2 controls with 754 cells, 3 S-HSCR with 643 cells, intermediated HSCR#1 with 306 cells and 2 L-HSCR with 433 cells) were included for comparison and presented as groups. Tests marked by “\*\*\*\*”, “\*\*\*”, “\*\*” and “\*” represent they are statistically different from the controls of  $P$ -values  $<0.0001$ ,  $<0.001$ ,  $<0.01$  and  $<0.05$ , respectively. ns, not significantly different. In all the boxplots, each box represents the interquartile range (showing median, 25th and 75th percentile, and 1.5 the interquartile range).

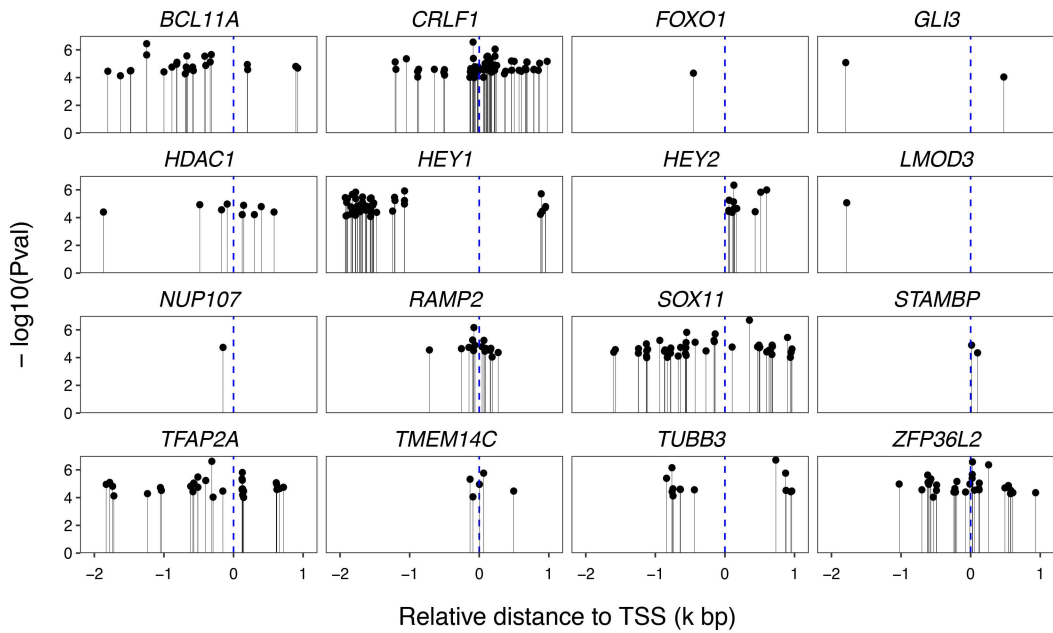

**Supplementary Fig. 5 Motif enrichment analysis.** Motif enrichment of HDAC1 at the promoter regions (-2k bp to 1k bp relative to TSS) of its target genes. *P*-values (Pval) were calculated by meme FIMO software.

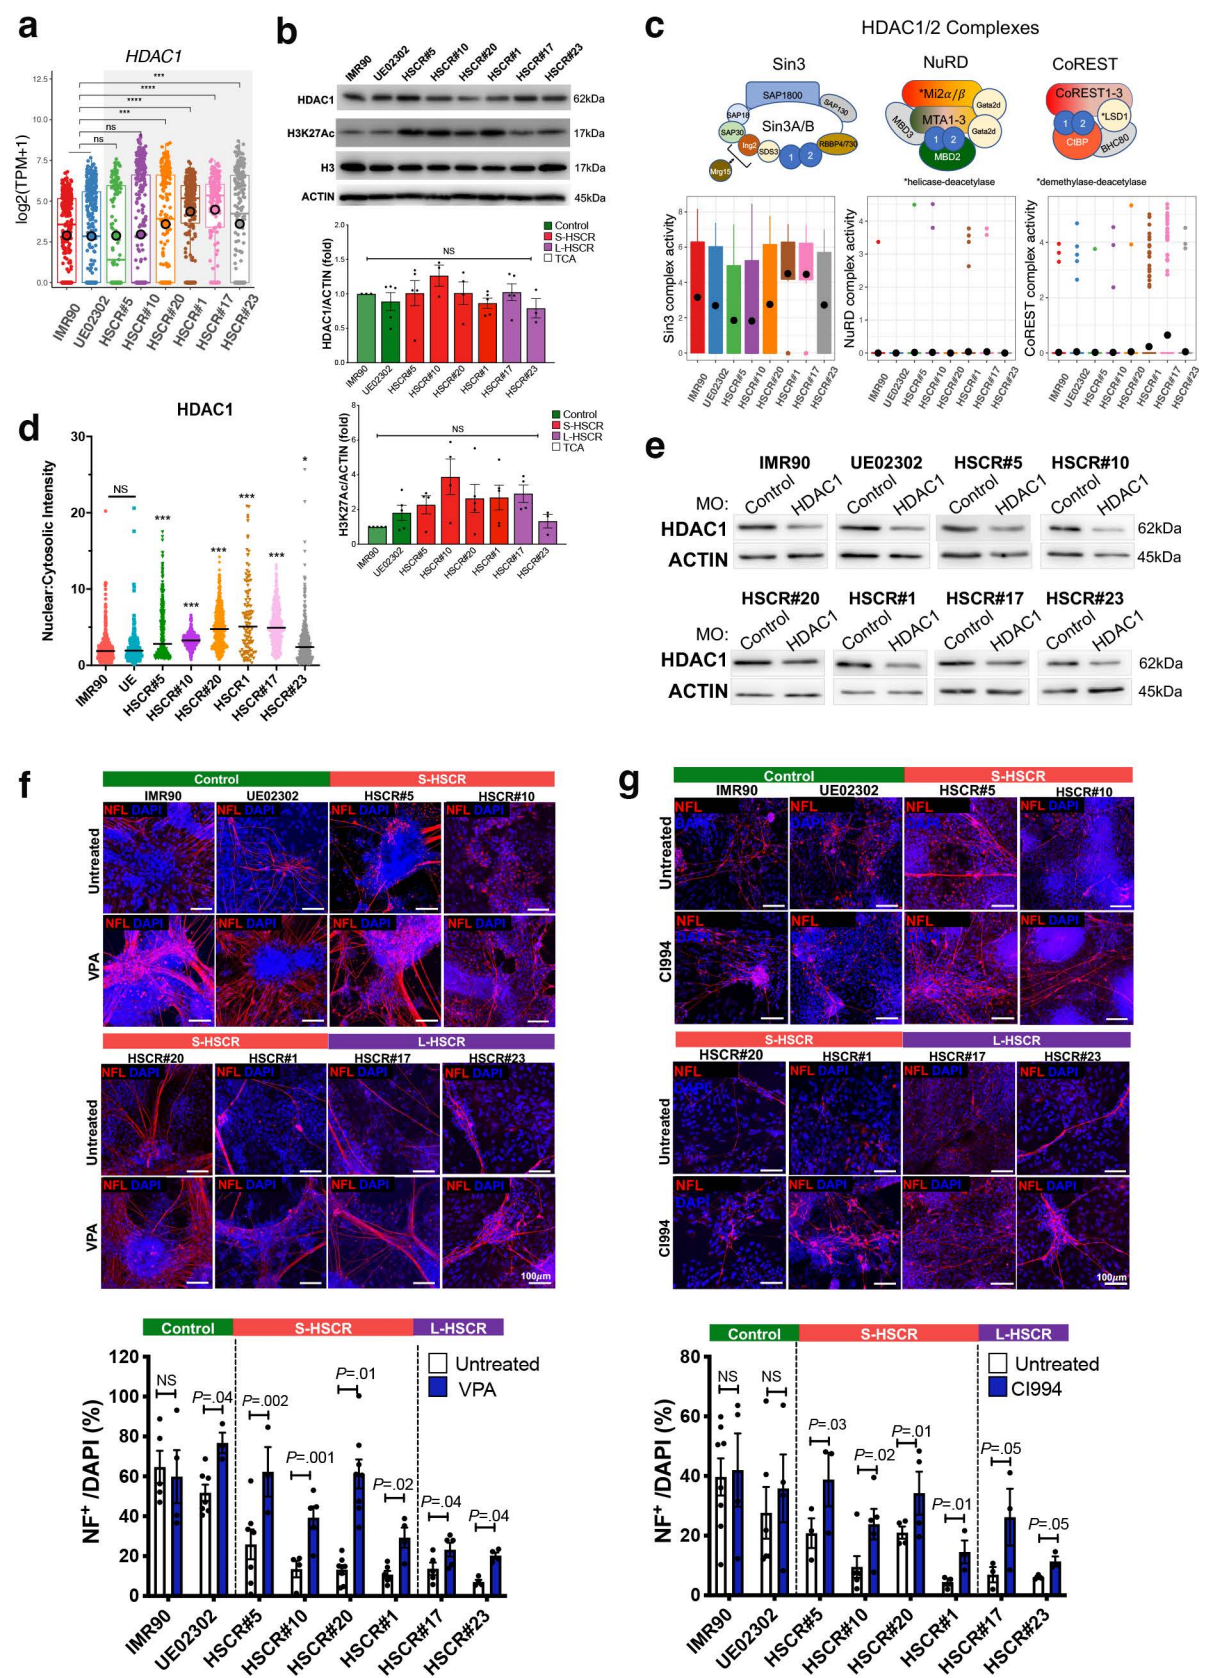

**Supplementary Fig. 6 Expression of HDAC1 and its deacetylation activity in control- and HSCR-ENCCs.** (a) *HDAC1* transcript levels were found to be slightly elevated only in the ENCCs derived from two S-HSCR and two L-HSCR lines as revealed by scRNA-seq analysis. Two-sided Wilcoxon rank-sum test was applied to calculate the significance of difference between two groups (2 controls with 754 cells, 161 HSCR#5 cells, 296 HSCR#10 cells, 186 HSCR#20 cells, 306 HSCR#1 cells, 187 HSCR#17 cells and 246 HSCR#23 cells). Tests marked by \*\*\*\*, \*\*\*, \*\*, and \* represent they are statistically different from the controls of  $P$ -values  $< 0.0001$ ,  $< 0.001$ ,  $< 0.01$  and  $< 0.05$ , respectively. ns, not significantly different. In the box plot, each box represents the interquartile range (showing median, 25th and 75th percentile, and 1.5 the interquartile range). (b) Western blot analyses show the expression levels of HDAC1 and H3K27Ac in control and HSCR-ENCCs. Representative images are shown. The samples derived from the same experiment and that gels/blots were processed in parallel. The mean expression levels relative to ACTIN from three-independent assays are shown in the bar charts (mean  $\pm$  SEM). (c) The inferred histone deacetylase activities of Sin3, NuRD, CoREST complexes in control and HSCR ENCCs were estimated based on the single-cell gene expression profiles. The mean values are marked by black dots. (d) The nuclear and cytoplasmic HDAC1 expression was quantified at the single cell level using CellProfiler. Data show the ratio of nuclear to cytosolic HDAC1 signal in each cell (each dot). The lines represent the median values of nuclear to cytosolic ratio in each group. (control: 226 cells, GW9508:224 cells, SAG: 220 cells, SAG+ETO:226 cells from 4 independent experiments were analyzed). \*\*\*, one-way ANOVA test  $P$ -value  $< 0.001$ . (e) Western blot shows the expression of HDAC1 in ENCCs treated with control and HDAC1-MO. ACTIN is the loading control. Representative images from 3 independent analyses are shown. *In vitro* differentiation assays in absence or presence of HDAC inhibitors: (f) Valproic acid (VPA, 1mM) and (g) HDAC class I inhibitor (CI994, 500nM). Cells were harvested for immunofluorescence staining at day 5 of neuronal differentiation. Chart shows the mean values  $\pm$  SEM from 3-8 independent experiments. (t-test, two-sides) Source data are provided as a Source Data file.

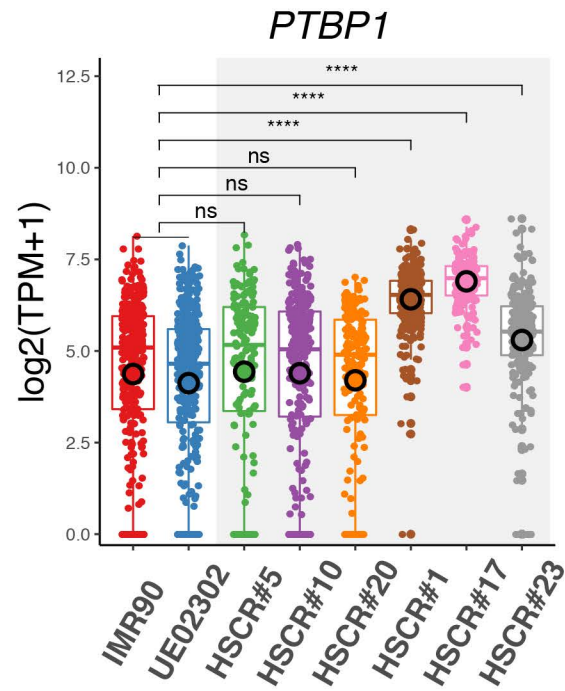

**Supplementary Fig. 7 Expression of *PTBP1* in control- and HSCR-ENCCs.** Boxplot shows expression level of *PTBP1* in control- and HSCR-ENCCs using scRNAseq data. Two-sided Wilcoxon rank-sum test was applied to calculate the significance of difference between two groups (2 controls with 754 cells, 161 HSCR#5 cells, 296 HSCR#10 cells, 186 HSCR#20 cells, 306 HSCR#1 cells, 187 HSCR#17 cells and 246 HSCR#23 cells). Tests marked by “\*\*\*\*”, “\*\*\*”, “\*\*” and “\*” represent they are statistically different from the controls of *P*-values <0.0001, <0.001, <0.01 and <0.05, respectively. ns, not significantly different. In the box plot, each box represents the interquartile range (IQR, the range between the 25th and 75<sup>th</sup> percentile) with the mid-point of the data, whiskers indicate the upper and lower value within 1.5 times the IQR.

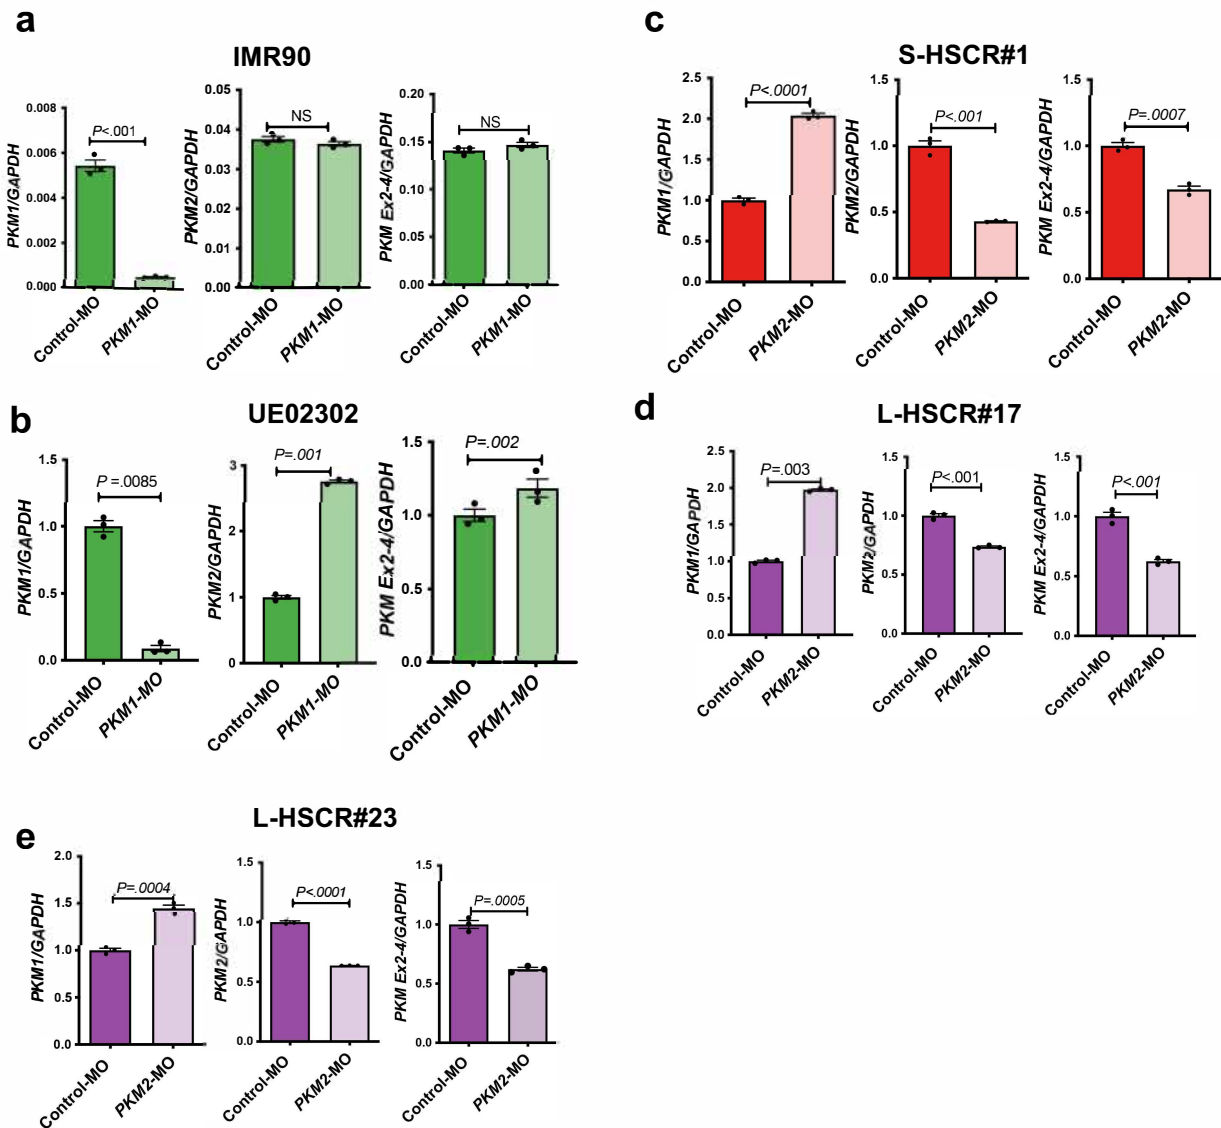

**Supplementary Fig. 8 Characterization of morpholinos knockdown cells.** RT-qPCR analyses of the expressions of *PKM1*, *PKM2* and *PKM Exon 2-4* in control- (a) IMR90 & (b) UE02302 and HSCR-ENCCs, (c) S-HSCR#1, (d) L-HSCR#17 & (e) L-HSCR-23 transfected with control- and *PKM1*- or *PKM2*-morpholinos (MO). Their expressions relative to *GAPDH* are shown. Data are presented as mean values  $\pm$  SEM. (t-test, two-sides)



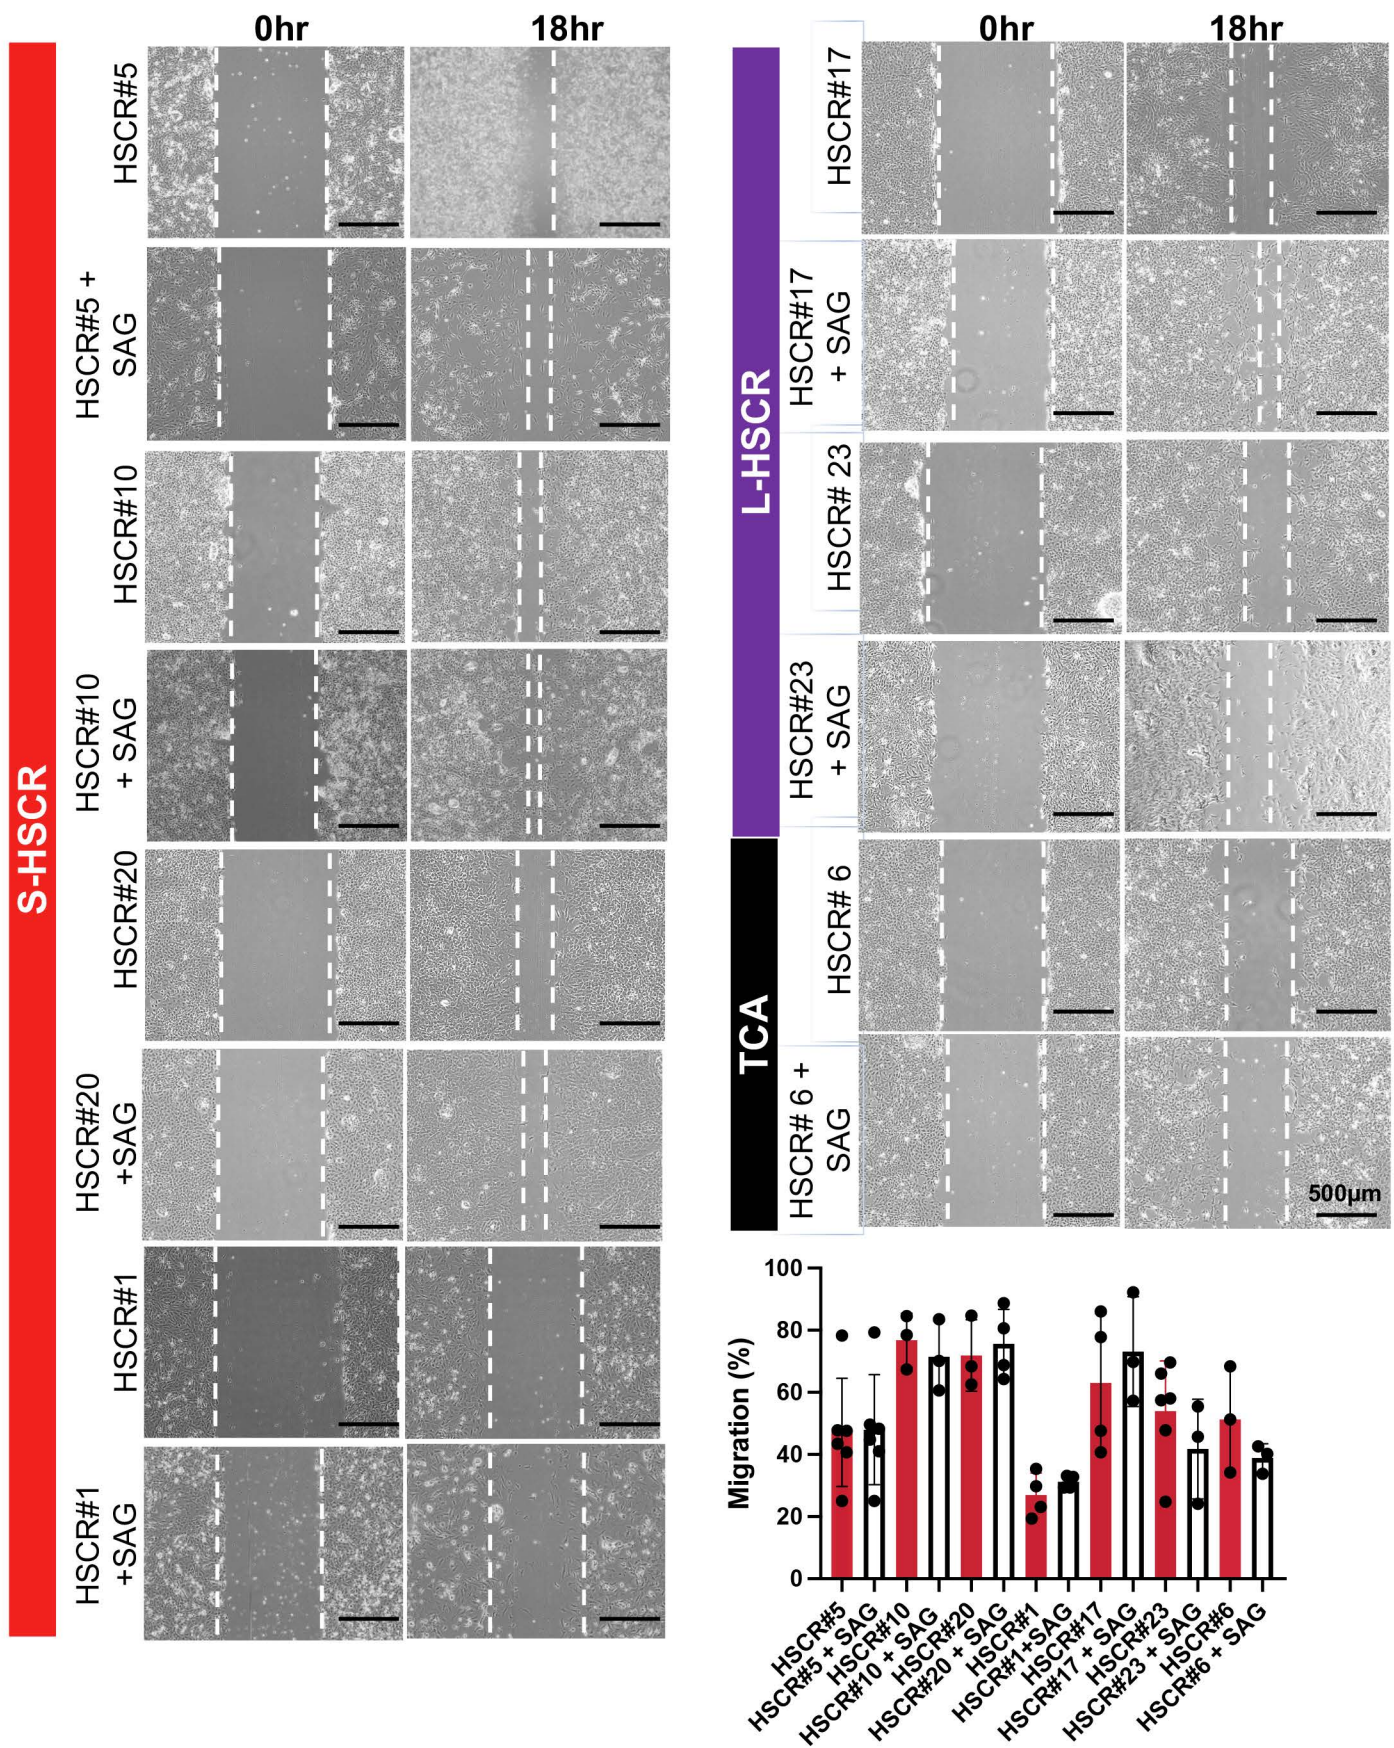

**Supplementary Fig. 9 Migration assays with control and SAG primed hENCCs.** Representative images of wound healing assays with unprimed and SAG-primed hENCCs. Bar chart shows the quantitative data from 3-8 independent experiments. Data are presented as mean values  $\pm$  SEM. (t-test, two-sides). Source data are provided as a Source Data file.

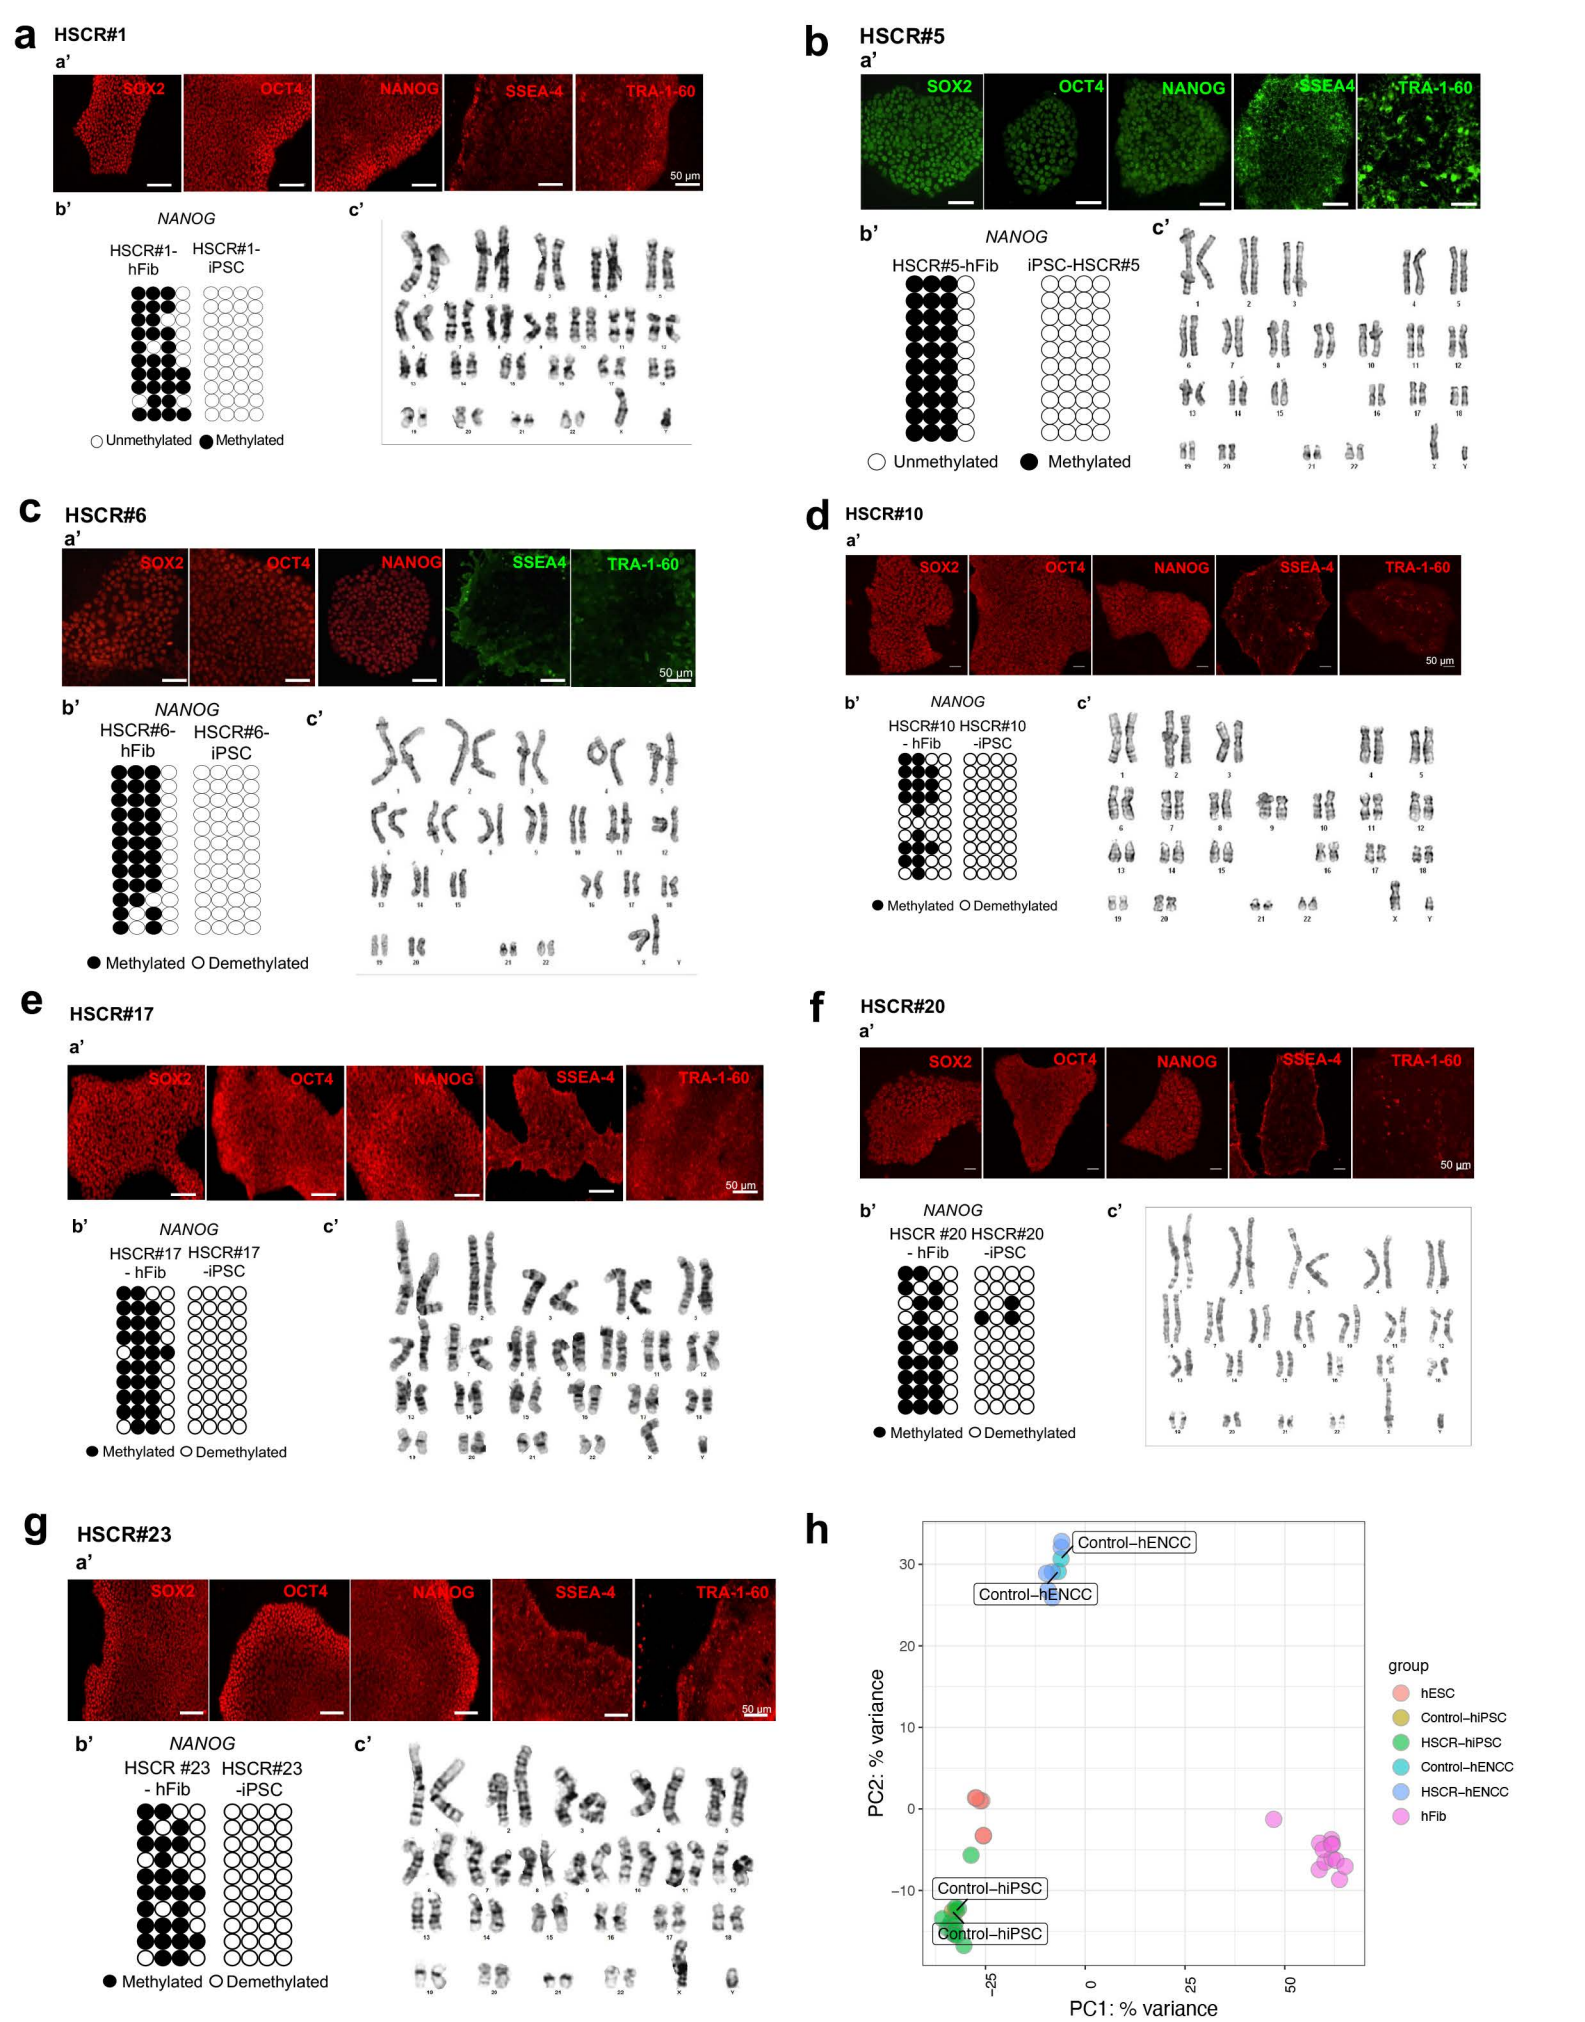

**Supplementary Fig. 10 Characterization of HSCR-iPSC lines.** a-g: a' Immunocytochemistry analysis on the expression of stem cell markers; b' Promoter of *NANOG* is unmethylated; c' Normal karyotype in HSCR-iPSC. h. PCA analysis of bulk RNA-seq data shows the transcriptomic profiles of all HSCR-iPSC lines are highly comparable to that of hES/hiPSC.

**Supplementary Table 1.** Primary antibodies used in this study

| Primary antibodies                     | Target antigen                                               | Dilution         | Application | Category No.                 | RRID        |
|----------------------------------------|--------------------------------------------------------------|------------------|-------------|------------------------------|-------------|
| Goat-anti-Ret                          | Receptor tyrosine kinase                                     | 1:100            | IHC         | Neuromics (GT15002)          | AB_2179886  |
| Mouse-anti-Tuj1                        | Neuronal classIII $\beta$ -tubulin                           | 1:500            | IHC         | Biologend (801202)           | AB_10063408 |
| Mouse-anti-Sox10 (CL4455)              | SOX (SRY-related HMG-box) family transcription factors Sox10 | 1:100            | IHC/ICC     | Atlas Antibodies (AMAb91297) | AB_2665884  |
| Goat-anti-Phox2b                       | Paired-like homeobox 2b                                      | 1:200            | IHC/ICC     | R&D Systems (AF4940)         | AB_10889846 |
| Rabbit-anti-Tuj1                       | Neuronal classIII $\beta$ -tubulin                           | 1:200            | ICC         | Abcam (ab18207)              | AB_444319   |
| Mouse-anti-Tyrosine Hydroxylase (LNC1) | Tyrosine Hydroxylase                                         | 1:200            | ICC         | Bioscience (MAB318)          | AB_2313764  |
| Chicken-anti-Neurofilament-Light (NF)  | Neurofilament                                                | 1:200            | ICC         | Neuromics (CH22105)          | AB_2737102  |
| Rabbit-anti-PGP9.5                     | Protein gene product 9.5                                     | 1:200            | ICC         | Abcam (ab108986)             | AB_10891773 |
| Mouse-anti-Actin, C4                   | $\beta$ -Actin                                               | 1:20000          | WB          | Millipore (MAB1501)          | AB_2223041  |
| Anti-HDAC1                             | HDAC1                                                        | 1:5000/<br>1:500 | WB/ICC      | Abcam (ab19845)              | AB_470299   |

|                                                                    |                                          |                                    |                |                             |             |
|--------------------------------------------------------------------|------------------------------------------|------------------------------------|----------------|-----------------------------|-------------|
| Anti-Histone H3                                                    | Histone 3                                | 1:5000                             | WB             | Abcam (ab4729)              | AB_2118291  |
| Rabbit-anti-Phospho-AMPK $\alpha$ (Thr172) (40H9)                  | p-AMPK $\alpha$                          | 1:1000                             | WB             | Cell Signaling (2535S)      | AB_331250   |
| Rabbit-anti-AMPK $\alpha$                                          | AMPK $\alpha$                            | 1:1000                             | WB             | Cell Signaling (2532S)      | AB_330331   |
| Rabbit-anti-Phospho-PKM2 (Tyr105)                                  | p-PKM2                                   | 1:1000                             | WB             | Cell Signaling (3827S)      | AB_1950369  |
| Rabbit-anti-PKM2                                                   | PKM2                                     | 1:1000                             | WB             | Cell Signaling (3198S)      | AB_2252325  |
| Rabbit-anti-Pyruvate Dehydrogenase E1-alpha subunit (phospho S293) | p-PDHA1                                  | 1:1000                             | WB             | Abcam (ab177461)            | AB_2756339  |
| Pyruvate Dehydrogenase (C54G1)                                     | PDHA1                                    | 1:1000                             | WB             | Cell Signaling (3205S)      | AB_2162926  |
| CD271-APC                                                          | Neurotrophin receptor p75 <sup>NTR</sup> | 0.2 $\mu$ /1x10 <sup>6</sup> cells | Flow cytometry | Miltenyi Biotec (130110078) | AB_2656849  |
| CD271-FITC                                                         | Neurotrophin receptor p75 <sup>NTR</sup> | 0.2 $\mu$ /1x10 <sup>6</sup> cells | Flow cytometry | Miltenyi Biotec (130091917) | AB_871651   |
| HNK1-APC                                                           | CD57                                     | 0.2 $\mu$ /1x10 <sup>6</sup> cells | Flow cytometry | BD Biosciences (560845)     | AB_10563760 |
| RET-PE                                                             | RET                                      | 5 $\mu$ /1x10 <sup>6</sup> cells   | Flow cytometry | Neuromics (FC15018)         | AB_1622005  |

**Supplementary Table 2.** Secondary antibodies used in this study

| <b>Secondary antibody</b>                         | <b>Dilution</b> | <b>Application</b> | <b>Category No.</b>        | <b>RRID</b> |
|---------------------------------------------------|-----------------|--------------------|----------------------------|-------------|
| Alexa Fluor® 488 Donkey-anti-rabbit IgG (H+L)     | 1:200           | IHC                | Invitrogen (A21206)        | AB_2535792  |
| Alexa Fluor® 488 Donkey-anti-mouse IgG (H+L)      | 1:200           | IHC                | Invitrogen (A21202)        | AB_141607   |
| Alexa Fluor® 594 Donkey-anti-rabbit IgG (H+L)     | 1:200           | IHC                | Invitrogen (A21207)        | AB_141637   |
| Alexa Fluor® 594 Donkey-anti-mouse IgG (H+L)      | 1:200           | IHC                | Invitrogen (A21203)        | AB_141633   |
| Alexa Fluor® 647 Donkey-anti-mouse IgG (H+L)      | 1:200           | IHC                | Invitrogen (A31571)        | AB_162542   |
| Alexa Fluor® 488 Donkey-anti-guinea pig IgG (H+L) | 1:200           | IHC                | Sigma (SAB4600033)         | AB_2890881  |
| Goat-anti-rabbit HRP                              | 1:2000          | WB                 | Dako Cytomation<br>(P0448) | AB_2617138  |
| Goat-anti-mouse HRP                               | 1:2000          | WB                 | Dako Cytomation (P0447)    | AB_2617137  |
| Rabbit-anti-goat HRP                              | 1:2000          | WB                 | Dako Cytomation (P0449)    | AB_2617143  |

**Supplementary Table 3:** List of Morpholinos used in this study.

| <b>Morpholino</b> | <b>Target gene</b> | <b>Oligo sequences (5' → 3')</b> | <b>Remarks</b>                                 |
|-------------------|--------------------|----------------------------------|------------------------------------------------|
| Control-MO        | -                  | CCTCTTACCTCAGTTACAATTTATA        |                                                |
| <i>PKM1</i> -MO   | <i>PKM</i>         | CACGAGCTATCTGTAAGGTTTAGGG        | Targeting junction between intron8 and exon9   |
| <i>PKM2</i> -MO   | <i>PKM</i>         | GCTGCCGCCTCCTACCTGCCAG           | Targeting junction between exon10 and intron10 |
| <i>HDAC1</i> -MO  | <i>HDAC1</i>       | TCGCCTCCCGTCCCTACCGTCAG          | Translation blocking                           |

**Supplementary Table 4:** List of oligos used in this study.

| Target gene      | Oligo sequences                                                                   | Annealing Temp (°C) | Product Size (bp) | Experiment used |
|------------------|-----------------------------------------------------------------------------------|---------------------|-------------------|-----------------|
| <i>PKM Ex2-4</i> | Forward: 5'--3' CGGAACACTGGCATCATCTG<br>Reverse: 5'--3' TCTTGATGGTCTCCGCATGG      | 57.2                | 142               | RT-qPCR         |
| <i>PKM Ex9</i>   | Forward: 5'--3' CAGCCAAAGGGGACTATCCT<br>Reverse: 5'--3' GAGGCTCGCACAAAGTTCTTC     | 56.5                | 99                | RT-qPCR         |
| <i>PKM Ex10</i>  | Forward: 5'--3' CTATCCTCTGGAGGCTGTGC<br>Reverse: 5'--3' GTGGGGTCGCTGGTAATG        | 57.2                | 133               | RT-qPCR         |
| <i>PTBP1 ex9</i> | Forward: 5'--3' GGTTCCCTCCCACCTTTGCC<br>Reverse: 5'--3' GGTGTGACTCTCTCTGGGTTGAGG  | 60                  | 197               | RT-qPCR         |
| <i>GAPDH</i>     | Forward: 5'--3' CAAGAAGGTGGTGAAGCAGGC<br>Reverse: 5'--3' GCCAAATTCGTTGTCATACCAGGA | 60                  | 184               | RT-qPCR         |
