# Supplementary material for: Transcriptomics of Hirschsprung disease patient-derived enteric neural crest cells reveals a role for oxidative phosphorylation
Source: PubMed Central journal article supplement (PMC10105741; doi:10.1038/s41467-023-37928-5), 2023-04-15
Supplement: 41467_2023_37928_MOESM4_ESM.pdf [file 41467_2023_37928_MOESM4_ESM.pdf]

### **Description of Additional Supplementary Files**

File Name: Supplementary Data 1

Description: Sequencing information of individual samples.

File Name: Supplementary Data 2

Description: The expression dynamics of 833 top DEGs were catalogued into 4 major modules.

File Name: Supplementary Data 3

Description: Top AS events contributed to PC2 in Fig. 4e
