# Supplementary material for: Transcriptomics of Hirschsprung disease patient-derived enteric neural crest cells reveals a role for oxidative phosphorylation
Source: Nat Commun. 2023 Apr 15;14:2157. doi: 10.1038/s41467-023-37928-5 (PMC10105741; doi:10.1038/s41467-023-37928-5)
Supplement: Supplementary file 5 — Supplementary Data 1 [file 41467_2023_37928_MOESM5_ESM.xlsx]

## Sheet: Sheet1
Supplementary Data 1. Sequencing information of individual samples.
Sample name	Single-cell sequencing kit	Number of Cells before QC	Number of Cells after QC	Mean Uniquely mapped reads number	Mean Uniquely mapped reads Percentage (%)	Mean Number of splices	Mean Genes per Cell
IMR90	Smart-seq® v4 (Clontech) kit	398	388	528627	91.1	390676	6116
UE02302	Smart-seq® v4 (Clontech) kit	390	383	551599	91.3	437384	5946
HSCR#5	Smart-seq® v4 (Clontech) kit	384	357	529365	87.7	391458	5646
HSCR#20	Smart-seq® v4 (Clontech) kit	384	342	595668	89.2	405418	6236
HSCR#10	Smart-seq® v4 (Clontech) kit	384	328	496522	84.2	377100	5084
HSCR#1	Smart-seq® v4 (Clontech) kit	384	337	1117358	83.7	1417697	7542
HSCR#17	Smart-seq® v4 (Clontech) kit	376	244	1067904	81.1	1181273	8512
HSCR#23	Smart-seq® v4 (Clontech) kit	280	271	1511435	84.6	1816844	6397
HSCR#6	Smart-seq® v4 (Clontech) kit	362	335	539360	88.8	416408	5621
MEAN		371.333	331.667	770871	86.8556	759362	6344.44
SUM		3342	2985	6937838
