# Supplementary material for: Transcriptomics of Hirschsprung disease patient-derived enteric neural crest cells reveals a role for oxidative phosphorylation
Source: Nat Commun. 2023 Apr 15;14:2157. doi: 10.1038/s41467-023-37928-5 (PMC10105741; doi:10.1038/s41467-023-37928-5)
Supplement: Supplementary file 6 — Supplementary Data 2 [file 41467_2023_37928_MOESM6_ESM.xlsx]

## Sheet: Supplementary Data 2
Supplementary Data 2. Four gene modules and 833 DEGs.
Gene	Module	Slope	P-value
TMSB10	Module 1 (49 genes)	2.52861	2.69936e-188
PDZD4	Module 1 (49 genes)	0.0918743	0.0197276
NOTCH3	Module 1 (49 genes)	0.920379	4.59169e-25
NUAK1	Module 1 (49 genes)	1.14969	9.89984e-42
RUNX1T1	Module 1 (49 genes)	1.03404	1.38007e-33
YPEL1	Module 1 (49 genes)	0.488359	2.24867e-07
MAP1LC3A	Module 1 (49 genes)	0.511776	4.70957e-10
ARMCX3	Module 1 (49 genes)	0.641009	7.12481e-11
CRYM	Module 1 (49 genes)	0.408148	1.08504e-06
PLEKHA4	Module 1 (49 genes)	1.23037	1.33614e-37
GLI3	Module 1 (49 genes)	1.18371	8.73497e-44
FN1	Module 1 (49 genes)	0.845897	5.32367e-18
DHCR24	Module 1 (49 genes)	0.675078	1.2381e-14
ACOT2	Module 1 (49 genes)	1.50791	1.36872e-55
DNAJC15	Module 1 (49 genes)	1.23247	6.16105e-42
EFNB2	Module 1 (49 genes)	1.1605	8.60177e-34
ARHGAP32	Module 1 (49 genes)	0.822765	2.76598e-18
HEY2	Module 1 (49 genes)	1.26887	1.03694e-39
TFAP2A	Module 1 (49 genes)	1.49216	1.02078e-54
NFIB	Module 1 (49 genes)	0.229574	8.40509e-07
DPYSL4	Module 1 (49 genes)	0.540422	1.10001e-09
TMED4	Module 1 (49 genes)	0.986827	5.28489e-24
SON	Module 1 (49 genes)	1.17418	2.34116e-51
EIF4A1	Module 1 (49 genes)	1.61528	2.83895e-85
FRZB	Module 1 (49 genes)	0.488334	5.49057e-08
CRELD1	Module 1 (49 genes)	0.618179	3.53422e-14
TTYH1	Module 1 (49 genes)	1.35183	1.72577e-44
FILIP1L	Module 1 (49 genes)	0.825468	1.90621e-21
HNRNPH1	Module 1 (49 genes)	0.752389	7.54304e-20
AFAP1L2	Module 1 (49 genes)	0.34001	1.0136e-05
STAG3L3	Module 1 (49 genes)	0.46468	2.41907e-06
FGFBP3	Module 1 (49 genes)	1.18105	1.63855e-35
NR2F1	Module 1 (49 genes)	1.37688	3.12038e-46
CTXN1	Module 1 (49 genes)	1.34764	1.0049e-46
FIGN	Module 1 (49 genes)	0.718971	2.10603e-13
ACOT1	Module 1 (49 genes)	1.33325	1.33595e-44
NOTUM	Module 1 (49 genes)	0.890638	5.46807e-25
NR2F2	Module 1 (49 genes)	1.69626	2.30834e-71
HES4	Module 1 (49 genes)	1.36362	1.99524e-45
MT-ND6	Module 1 (49 genes)	1.44829	1.65209e-90
THUMPD3-AS1	Module 1 (49 genes)	1.11984	1.22077e-30
PPP1R14BP2	Module 1 (49 genes)	0.535194	2.92196e-10
CKLF	Module 1 (49 genes)	0.0645123	0.463909
FAM19A5	Module 1 (49 genes)	0.963628	9.23534e-25
AC245595.1	Module 1 (49 genes)	1.08795	1.48676e-30
C4orf48	Module 1 (49 genes)	1.59729	2.88595e-82
LINC00461	Module 1 (49 genes)	0.22364	4.09242e-06
TUBB3	Module 1 (49 genes)	1.72575	1.21277e-73
DACH1	Module 1 (49 genes)	1.09036	5.63604e-31
CRLF1	Module 2 (31 genes)	-1.16779	2.41239e-49
TRAPPC6A	Module 2 (31 genes)	-0.970222	1.70694e-23
FHL1	Module 2 (31 genes)	-1.40654	3.36817e-48
GPC4	Module 2 (31 genes)	-1.2557	1.90945e-43
FXYD5	Module 2 (31 genes)	-1.87196	2.06064e-87
CCNB1IP1	Module 2 (31 genes)	-0.656774	1.06286e-13
CEP152	Module 2 (31 genes)	-1.5946	2.4893e-62
PPFIBP1	Module 2 (31 genes)	-0.837062	1.32081e-17
NUP107	Module 2 (31 genes)	-0.970232	9.41565e-28
TMEM14C	Module 2 (31 genes)	-0.791657	1.65104e-33
FARSB	Module 2 (31 genes)	-1.15203	7.86705e-48
CRYZ	Module 2 (31 genes)	-0.890053	9.64459e-20
PRDX4	Module 2 (31 genes)	-1.34218	6.62601e-97
G0S2	Module 2 (31 genes)	-0.599932	2.0239e-22
FOSB	Module 2 (31 genes)	-0.507888	4.03495e-28
MTX2	Module 2 (31 genes)	-1.1861	2.31549e-41
RFC3	Module 2 (31 genes)	-1.56121	1.16468e-59
ORC3	Module 2 (31 genes)	-1.20743	1.60727e-35
NEK1	Module 2 (31 genes)	-0.506283	2.75661e-07
ZGRF1	Module 2 (31 genes)	-1.91648	5.21532e-92
GULP1	Module 2 (31 genes)	-0.629066	1.83831e-13
CELF5	Module 2 (31 genes)	-0.38453	5.38737e-14
SNTB1	Module 2 (31 genes)	-0.943308	5.28655e-35
PAAF1	Module 2 (31 genes)	-1.08522	7.98554e-29
DDX10	Module 2 (31 genes)	-0.868779	7.22074e-19
ANKRD18A	Module 2 (31 genes)	-0.61458	3.05788e-27
UBE2H	Module 2 (31 genes)	-0.658528	2.11288e-11
RPS4X	Module 2 (31 genes)	-1.29405	2.85128e-50
RPL10P9	Module 2 (31 genes)	-2.75081	2.56964e-211
THAP9-AS1	Module 2 (31 genes)	-1.10983	4.15165e-30
BANCR	Module 2 (31 genes)	-0.345609	1.65543e-16
KRIT1	Module 3 (518 genes)	0.410446	3.16447e-05
PAF1	Module 3 (518 genes)	0.475888	1.35764e-06
ELOA	Module 3 (518 genes)	0.4794	1.15044e-06
PTBP1	Module 3 (518 genes)	1.00446	1.36197e-28
TMEM159	Module 3 (518 genes)	0.411772	2.94213e-05
MRPL43	Module 3 (518 genes)	0.568288	1.12165e-12
RPL18	Module 3 (518 genes)	1.40277	4.69652e-54
U2AF2	Module 3 (518 genes)	1.05655	6.65866e-28
NTHL1	Module 3 (518 genes)	0.150513	0.0776846
SMARCD1	Module 3 (518 genes)	1.05607	2.21957e-27
NEO1	Module 3 (518 genes)	0.377521	1.19264e-05
ZFY	Module 3 (518 genes)	0.710733	2.60417e-22
IDH3G	Module 3 (518 genes)	0.586542	2.53306e-09
NDST1	Module 3 (518 genes)	0.50137	1.38235e-10
PTPN21	Module 3 (518 genes)	0.359146	8.27516e-07
TCF3	Module 3 (518 genes)	0.922242	3.51735e-21
FBXW11	Module 3 (518 genes)	0.569284	3.39643e-09
XRCC1	Module 3 (518 genes)	0.679496	4.72374e-12
GLI2	Module 3 (518 genes)	0.283251	3.22013e-05
MRPS34	Module 3 (518 genes)	0.287818	7.68246e-05
NKAIN1	Module 3 (518 genes)	0.766086	5.51483e-17
SEPHS1	Module 3 (518 genes)	0.284113	0.00400934
RPL6	Module 3 (518 genes)	1.34579	6.38368e-53
RPLP0	Module 3 (518 genes)	1.35506	1.17581e-51
PEBP1	Module 3 (518 genes)	1.61194	8.75912e-108
NUDC	Module 3 (518 genes)	0.0325356	0.584158
RNF31	Module 3 (518 genes)	0.507757	2.38443e-07
ACOT7	Module 3 (518 genes)	0.215369	0.0292347
MZF1	Module 3 (518 genes)	0.496304	2.43099e-11
ATP5D	Module 3 (518 genes)	0.727688	4.93168e-26
TIMM13	Module 3 (518 genes)	1.08978	1.65683e-40
POLR2E	Module 3 (518 genes)	0.415349	4.52378e-09
GCAT	Module 3 (518 genes)	0.608967	5.64103e-10
EIF3L	Module 3 (518 genes)	0.092647	0.0938591
POLR2F	Module 3 (518 genes)	0.524797	6.68148e-12
PPP6R2	Module 3 (518 genes)	0.611276	1.77366e-11
AP1B1	Module 3 (518 genes)	0.472544	1.62994e-07
MCAT	Module 3 (518 genes)	0.172561	0.0293656
PRPF6	Module 3 (518 genes)	0.608994	6.02363e-10
E2F1	Module 3 (518 genes)	-0.0871386	0.285728
ZNF423	Module 3 (518 genes)	1.06736	2.96936e-30
CTCF	Module 3 (518 genes)	0.244714	0.0132203
QPRT	Module 3 (518 genes)	0.984364	1.32448e-28
CHRAC1	Module 3 (518 genes)	0.3117	0.0015897
R3HCC1	Module 3 (518 genes)	0.652838	3.14701e-11
RPS16	Module 3 (518 genes)	0.787068	4.14913e-21
FZR1	Module 3 (518 genes)	0.219688	0.0059235
RPS19	Module 3 (518 genes)	1.36023	5.16148e-50
GRWD1	Module 3 (518 genes)	0.557947	1.44509e-08
RPL18A	Module 3 (518 genes)	1.73504	5.12276e-94
ERF	Module 3 (518 genes)	0.560562	8.47034e-11
MTPN	Module 3 (518 genes)	0.614838	4.12068e-10
TSPAN12	Module 3 (518 genes)	0.0324568	0.616173
WASL	Module 3 (518 genes)	0.625987	1.68767e-10
BCL7B	Module 3 (518 genes)	0.20142	0.0414306
SPIN1	Module 3 (518 genes)	0.821558	4.9421e-17
RGP1	Module 3 (518 genes)	0.260272	4.51705e-05
CCNJ	Module 3 (518 genes)	0.349522	9.3859e-05
RPL19	Module 3 (518 genes)	1.78672	2.11571e-102
UBTF	Module 3 (518 genes)	0.719646	2.00558e-13
CASC3	Module 3 (518 genes)	0.540545	4.00146e-08
CBX1	Module 3 (518 genes)	1.02451	1.89218e-38
PFN1	Module 3 (518 genes)	0.772696	1.89686e-17
GOSR1	Module 3 (518 genes)	0.476725	1.32013e-06
TMEM97	Module 3 (518 genes)	0.48257	8.59607e-07
USP46	Module 3 (518 genes)	0.478291	1.20547e-06
KIAA1211	Module 3 (518 genes)	0.692934	1.15542e-13
WFS1	Module 3 (518 genes)	0.282947	0.000207543
PRPF19	Module 3 (518 genes)	1.43012	5.49627e-50
CAMKK2	Module 3 (518 genes)	0.849721	6.43646e-21
BCL7A	Module 3 (518 genes)	1.37086	2.2772e-47
CHD4	Module 3 (518 genes)	0.924507	5.98568e-26
ATN1	Module 3 (518 genes)	0.367728	1.53179e-05
ICK	Module 3 (518 genes)	0.351017	5.86187e-05
RPS12	Module 3 (518 genes)	1.12241	3.26274e-35
CUTA	Module 3 (518 genes)	0.652339	1.46921e-16
FBRSL1	Module 3 (518 genes)	0.882794	1.08519e-26
RBP1	Module 3 (518 genes)	1.15171	6.60113e-41
RPL24	Module 3 (518 genes)	0.854183	1.12916e-24
RPS15	Module 3 (518 genes)	1.51644	2.05002e-73
NDUFS7	Module 3 (518 genes)	0.699166	2.42848e-25
HDLBP	Module 3 (518 genes)	0.968378	3.72978e-23
HPCAL1	Module 3 (518 genes)	0.42754	4.74157e-06
SCAMP3	Module 3 (518 genes)	0.291529	0.00315021
KIAA2013	Module 3 (518 genes)	0.290528	0.0026733
UBN1	Module 3 (518 genes)	0.419479	1.79114e-05
KCNJ5	Module 3 (518 genes)	0.174667	8.1187e-08
ELF1	Module 3 (518 genes)	0.381939	8.58152e-05
COIL	Module 3 (518 genes)	0.249179	0.011566
ABCC11	Module 3 (518 genes)	0.341024	8.82516e-11
MRPS2	Module 3 (518 genes)	0.112813	0.203615
SLC25A51	Module 3 (518 genes)	0.572081	5.16291e-11
IKZF4	Module 3 (518 genes)	0.735073	4.48298e-19
B9D2	Module 3 (518 genes)	0.432814	5.75039e-06
MXD4	Module 3 (518 genes)	1.51578	1.42675e-56
NCOA5	Module 3 (518 genes)	0.673093	4.54235e-13
DDX27	Module 3 (518 genes)	0.501938	3.45805e-07
BCAS4	Module 3 (518 genes)	1.92159	7.48817e-93
AL365205.1	Module 3 (518 genes)	1.0791	5.31223e-33
RPS10	Module 3 (518 genes)	0.89361	4.90386e-25
GTF2F1	Module 3 (518 genes)	0.923973	3.4992e-21
ALKBH7	Module 3 (518 genes)	0.679089	4.86523e-12
RALY	Module 3 (518 genes)	0.383123	3.70175e-07
ROMO1	Module 3 (518 genes)	1.06387	6.9539e-48
COX6B1	Module 3 (518 genes)	0.641199	3.30243e-14
TUBBP1	Module 3 (518 genes)	0.100672	0.238908
ATF4	Module 3 (518 genes)	0.105754	0.113046
ILF3	Module 3 (518 genes)	0.612642	1.22647e-15
ABHD17A	Module 3 (518 genes)	0.365029	0.000216034
ELOF1	Module 3 (518 genes)	0.299436	0.00242183
LSM7	Module 3 (518 genes)	0.880717	1.87274e-33
TULP4	Module 3 (518 genes)	1.27307	1.35676e-39
MAP1S	Module 3 (518 genes)	0.615217	9.67418e-11
PAK4	Module 3 (518 genes)	0.391327	3.12608e-08
TAF4	Module 3 (518 genes)	0.131525	0.00772165
ZNF236	Module 3 (518 genes)	0.199349	0.0279271
AAR2	Module 3 (518 genes)	0.369778	0.000175628
ZNF428	Module 3 (518 genes)	0.962548	6.25853e-23
HAUS8	Module 3 (518 genes)	-0.455226	3.88466e-06
NDUFA2	Module 3 (518 genes)	0.734273	1.25361e-22
PCBD2	Module 3 (518 genes)	0.41626	5.32792e-06
CSNK1G2	Module 3 (518 genes)	0.826979	2.59609e-17
DPF2	Module 3 (518 genes)	0.529989	7.42417e-08
CCNJL	Module 3 (518 genes)	0.805621	1.27857e-18
BICDL1	Module 3 (518 genes)	0.193439	3.40989e-07
DHX9	Module 3 (518 genes)	0.47066	1.48075e-08
CHST12	Module 3 (518 genes)	0.116525	0.135363
LRRC8A	Module 3 (518 genes)	0.829048	1.87615e-18
ODF2	Module 3 (518 genes)	0.162254	0.0504156
ZSCAN9	Module 3 (518 genes)	0.471861	1.40215e-06
HMGA1	Module 3 (518 genes)	0.844755	1.00719e-24
TGS1	Module 3 (518 genes)	0.418167	2.22853e-05
GLTP	Module 3 (518 genes)	0.584118	2.59664e-09
TCHP	Module 3 (518 genes)	0.416631	2.24531e-05
FAM222A	Module 3 (518 genes)	0.636214	8.59026e-19
ESYT1	Module 3 (518 genes)	0.845807	5.5881e-18
ANP32A	Module 3 (518 genes)	0.883107	7.68404e-30
TCF25	Module 3 (518 genes)	0.771349	1.00057e-18
TP53	Module 3 (518 genes)	0.64364	3.73652e-11
NFIC	Module 3 (518 genes)	0.212971	0.0059059
TPGS1	Module 3 (518 genes)	0.764629	6.009e-15
MVB12A	Module 3 (518 genes)	0.389742	7.7957e-05
CCDC97	Module 3 (518 genes)	0.645599	2.18344e-13
RPS11	Module 3 (518 genes)	1.28337	1.10917e-54
RPL13A	Module 3 (518 genes)	2.28473	5.02628e-157
PEX14	Module 3 (518 genes)	0.526954	1.19486e-08
ZNF593	Module 3 (518 genes)	0.39803	5.46187e-05
WDTC1	Module 3 (518 genes)	0.12276	0.00432947
BCL10	Module 3 (518 genes)	0.506292	1.11898e-07
ARF1	Module 3 (518 genes)	0.530639	3.27414e-12
PARP1	Module 3 (518 genes)	1.51948	1.73269e-91
LIPT1	Module 3 (518 genes)	0.361685	0.000245124
VGLL4	Module 3 (518 genes)	1.08497	7.77683e-29
KLHL8	Module 3 (518 genes)	0.235128	0.0117826
ZNF300	Module 3 (518 genes)	0.953542	9.09722e-23
MDH2	Module 3 (518 genes)	0.538226	4.17413e-15
SLC12A9	Module 3 (518 genes)	0.282923	7.42063e-07
CNPY1	Module 3 (518 genes)	1.15796	4.09435e-43
RPL10	Module 3 (518 genes)	2.07146	4.47343e-124
UTP23	Module 3 (518 genes)	0.382301	0.000106634
RPL7A	Module 3 (518 genes)	1.29835	8.98134e-49
SH3GLB2	Module 3 (518 genes)	0.377889	2.29964e-05
INCENP	Module 3 (518 genes)	-0.264675	0.00543095
MRPL49	Module 3 (518 genes)	0.112013	0.206491
TAOK2	Module 3 (518 genes)	0.255297	0.000470081
ZNF827	Module 3 (518 genes)	0.750709	1.37128e-16
ZNF547	Module 3 (518 genes)	0.315661	2.71349e-07
OLAH	Module 3 (518 genes)	0.117284	1.4168e-05
CDYL	Module 3 (518 genes)	0.411962	2.0187e-05
LARP1	Module 3 (518 genes)	0.656378	1.94583e-11
EEF1A1	Module 3 (518 genes)	1.04932	1.19342e-31
ZNF618	Module 3 (518 genes)	0.980329	6.18184e-31
MRAS	Module 3 (518 genes)	0.602411	1.00928e-11
PSKH1	Module 3 (518 genes)	0.539223	1.53306e-13
ATAD3B	Module 3 (518 genes)	0.272201	0.000380688
ZNF362	Module 3 (518 genes)	0.723017	1.01826e-16
G6PD	Module 3 (518 genes)	0.247658	0.000319666
C21orf58	Module 3 (518 genes)	-0.101001	0.255395
RDH13	Module 3 (518 genes)	0.199822	0.0242512
CPSF4	Module 3 (518 genes)	0.427875	1.39869e-05
VPS28	Module 3 (518 genes)	0.601915	2.13153e-16
ORAI2	Module 3 (518 genes)	0.775674	1.511e-18
ALKBH4	Module 3 (518 genes)	0.395388	5.97857e-05
RPL8	Module 3 (518 genes)	1.35242	6.84652e-53
DVL3	Module 3 (518 genes)	0.832163	2.04869e-17
LSM12	Module 3 (518 genes)	0.717669	2.73563e-13
RAVER1	Module 3 (518 genes)	0.678617	7.27153e-21
RNASEK-C17orf49	Module 3 (518 genes)	0.679223	3.41993e-12
TAF6L	Module 3 (518 genes)	0.387426	3.44855e-05
VPS72	Module 3 (518 genes)	0.159976	0.047454
PYGO2	Module 3 (518 genes)	0.370157	8.01209e-06
RYBP	Module 3 (518 genes)	0.482158	3.6914e-09
APEH	Module 3 (518 genes)	0.478868	1.18238e-06
USP49	Module 3 (518 genes)	0.354423	4.03231e-05
TMUB1	Module 3 (518 genes)	0.371548	0.000146981
METTL2B	Module 3 (518 genes)	0.265723	0.00712266
AMOTL1	Module 3 (518 genes)	0.332251	0.000669631
CCT2	Module 3 (518 genes)	0.510916	5.10238e-14
SP2	Module 3 (518 genes)	0.292828	0.000640606
TBC1D16	Module 3 (518 genes)	0.646573	3.91235e-14
GPX4	Module 3 (518 genes)	0.915599	3.42477e-29
MIDN	Module 3 (518 genes)	1.22536	2.04906e-49
JSRP1	Module 3 (518 genes)	1.41984	1.77631e-74
GATAD2A	Module 3 (518 genes)	0.285071	0.00294217
ANKRD11	Module 3 (518 genes)	0.544077	1.11541e-08
RPL13	Module 3 (518 genes)	1.87754	8.9137e-99
NCKAP5L	Module 3 (518 genes)	0.626976	6.00403e-14
SRRM2	Module 3 (518 genes)	1.50134	4.88417e-75
NUDT16L1	Module 3 (518 genes)	0.773766	3.1194e-15
NKIRAS2	Module 3 (518 genes)	0.598213	1.21002e-09
TMEM223	Module 3 (518 genes)	0.48309	9.50392e-07
HIC2	Module 3 (518 genes)	0.606703	2.83819e-12
GPS1	Module 3 (518 genes)	0.43336	1.1096e-05
LIMS1	Module 3 (518 genes)	0.479567	1.13529e-06
BRD3	Module 3 (518 genes)	0.561369	1.17099e-08
ZNF764	Module 3 (518 genes)	0.286856	0.000211455
SF3B5	Module 3 (518 genes)	0.731259	7.61802e-26
ATP6V0E2	Module 3 (518 genes)	0.91904	5.71441e-21
C9orf16	Module 3 (518 genes)	0.55876	1.43396e-10
GAA	Module 3 (518 genes)	0.601339	3.90968e-10
CHD7	Module 3 (518 genes)	0.511324	7.7025e-09
BCL2L1	Module 3 (518 genes)	0.390582	8.72797e-07
POP7	Module 3 (518 genes)	-0.140174	0.00152752
ZNF24	Module 3 (518 genes)	0.906551	1.95373e-20
FAM222B	Module 3 (518 genes)	0.536055	1.01652e-08
MRPL57	Module 3 (518 genes)	0.539315	2.41586e-11
CNP	Module 3 (518 genes)	1.06896	5.41919e-28
JUP	Module 3 (518 genes)	0.933889	8.57918e-25
PPIAP7	Module 3 (518 genes)	0.191865	8.55299e-08
CBX2	Module 3 (518 genes)	0.474615	5.13189e-07
RPL10P2	Module 3 (518 genes)	0.780136	3.45011e-25
NDUFA11	Module 3 (518 genes)	0.645102	1.28047e-17
RAB1B	Module 3 (518 genes)	0.329586	0.000372493
MLXIP	Module 3 (518 genes)	0.777225	5.5034e-16
UBE2O	Module 3 (518 genes)	1.02524	5.66958e-27
COX8A	Module 3 (518 genes)	0.552065	5.72975e-13
SGF29	Module 3 (518 genes)	0.184152	0.0123188
ULK1	Module 3 (518 genes)	0.486257	2.07989e-09
RPLP2	Module 3 (518 genes)	1.14639	2.09364e-40
C12orf54	Module 3 (518 genes)	1.31673	9.59334e-55
SOX12	Module 3 (518 genes)	1.14701	9.78458e-45
RIC8A	Module 3 (518 genes)	0.262046	0.00771857
PPIAP33	Module 3 (518 genes)	0.809654	4.89738e-19
EXOSC4	Module 3 (518 genes)	0.278885	0.000511113
TUFM	Module 3 (518 genes)	0.456704	1.49765e-11
CTC1	Module 3 (518 genes)	0.340305	2.91323e-08
DPM3	Module 3 (518 genes)	0.527906	8.35418e-08
ZNF664	Module 3 (518 genes)	0.584711	2.78218e-09
RAD23A	Module 3 (518 genes)	0.0408413	0.604151
EMC3-AS1	Module 3 (518 genes)	-0.0664688	0.450749
CUEDC1	Module 3 (518 genes)	0.674222	5.51506e-16
FKRP	Module 3 (518 genes)	0.413561	2.91638e-09
TRAPPC5	Module 3 (518 genes)	0.556653	7.5285e-17
POLR2A	Module 3 (518 genes)	1.33054	2.82645e-44
YIPF6	Module 3 (518 genes)	0.755954	1.33811e-14
MRPL41	Module 3 (518 genes)	0.985743	2.94772e-36
HSP90AB3P	Module 3 (518 genes)	0.802345	5.00613e-21
AL109615.1	Module 3 (518 genes)	0.424356	2.74862e-10
BOLA2	Module 3 (518 genes)	0.979101	5.09834e-26
ALYREF	Module 3 (518 genes)	0.223415	0.00580702
BTBD9	Module 3 (518 genes)	0.515636	3.97577e-10
RPL7P26	Module 3 (518 genes)	0.293935	1.27994e-06
2009-09-01	Module 3 (518 genes)	1.27317	1.85446e-39
UBE2G2	Module 3 (518 genes)	0.320193	0.00117992
NOC4L	Module 3 (518 genes)	0.881342	2.21296e-19
BRI3BP	Module 3 (518 genes)	0.270667	0.00444825
ZFP36L1	Module 3 (518 genes)	1.46968	1.03996e-61
RPL12P4	Module 3 (518 genes)	0.843062	1.17047e-29
INSIG1	Module 3 (518 genes)	0.514491	3.83489e-09
RPL7P48	Module 3 (518 genes)	0.807983	3.42053e-28
SECISBP2	Module 3 (518 genes)	0.53452	5.73365e-08
HNRNPA1P61	Module 3 (518 genes)	0.462218	4.95345e-13
TUBB4B	Module 3 (518 genes)	-0.112506	0.176419
ACTBP11	Module 3 (518 genes)	1.88165	1.95935e-88
H2AFX	Module 3 (518 genes)	-0.272647	0.00576098
NDOR1	Module 3 (518 genes)	0.270433	1.42604e-05
KIAA0408	Module 3 (518 genes)	0.705616	5.51839e-14
GSPT2	Module 3 (518 genes)	0.594163	8.2515e-10
EEF1A1P5	Module 3 (518 genes)	0.719353	1.09916e-16
PPIA	Module 3 (518 genes)	0.833325	7.92236e-23
POM121	Module 3 (518 genes)	0.791564	2.19917e-17
NCOR2	Module 3 (518 genes)	1.16325	4.31682e-33
PLXNB2	Module 3 (518 genes)	0.704697	5.44247e-13
RABL6	Module 3 (518 genes)	0.831142	1.96163e-17
TLR7	Module 3 (518 genes)	0.310539	5.05029e-07
HIST1H3J	Module 3 (518 genes)	0.377396	9.0246e-06
RPL12	Module 3 (518 genes)	1.6259	1.1207e-79
ASNA1	Module 3 (518 genes)	0.328089	0.000887734
PLN	Module 3 (518 genes)	0.0840836	0.00361397
LDB1	Module 3 (518 genes)	1.05279	2.69845e-27
MTOR	Module 3 (518 genes)	0.35515	6.18529e-05
TOP1	Module 3 (518 genes)	0.976287	1.0485e-28
CHML	Module 3 (518 genes)	0.749565	9.19225e-15
TMEM57	Module 3 (518 genes)	0.534892	3.01619e-08
EHMT2	Module 3 (518 genes)	0.781432	1.63506e-15
HSPA1A	Module 3 (518 genes)	0.614493	2.12645e-10
PRRC2A	Module 3 (518 genes)	1.41017	4.80618e-50
ZBTB48	Module 3 (518 genes)	0.22539	0.00968226
UQCC3	Module 3 (518 genes)	0.499759	1.46449e-08
HSP90AB2P	Module 3 (518 genes)	0.306335	1.12475e-05
RPL23AP57	Module 3 (518 genes)	0.592088	6.57513e-13
TMEM200C	Module 3 (518 genes)	0.250085	6.21176e-06
HNRNPA1P40	Module 3 (518 genes)	0.761164	2.89934e-18
NUP62	Module 3 (518 genes)	0.569759	7.14746e-09
AL356535.1	Module 3 (518 genes)	0.203866	2.7495e-09
PDCL3P5	Module 3 (518 genes)	0.0980635	0.00118791
NPM1P46	Module 3 (518 genes)	1.38902	1.63411e-51
RPS7P8	Module 3 (518 genes)	0.387424	4.2987e-16
AC008155.1	Module 3 (518 genes)	1.05693	1.69956e-31
RPL12P42	Module 3 (518 genes)	0.209729	1.86763e-09
AC005521.1	Module 3 (518 genes)	1.30396	1.58775e-41
FTH1P12	Module 3 (518 genes)	0.44489	1.27882e-08
RPSAP46	Module 3 (518 genes)	0.675296	3.59167e-20
RPLP1P6	Module 3 (518 genes)	1.17187	9.43303e-34
AL672212.1	Module 3 (518 genes)	1.18474	7.52744e-37
HMGB1P37	Module 3 (518 genes)	1.50438	5.90955e-60
AL096829.1	Module 3 (518 genes)	1.13994	2.00353e-33
PPIAP42	Module 3 (518 genes)	0.589481	4.2429e-15
RPSAP54	Module 3 (518 genes)	0.174657	0.0158307
SLC25A5P3	Module 3 (518 genes)	0.155533	0.000130502
SERBP1P1	Module 3 (518 genes)	0.676927	4.75756e-22
NHP2P2	Module 3 (518 genes)	0.229333	7.59236e-06
AC098590.1	Module 3 (518 genes)	0.389606	2.98332e-12
VDAC1P2	Module 3 (518 genes)	0.330706	3.25883e-05
RPL7AP7	Module 3 (518 genes)	0.960983	1.25406e-25
RPL13AP7	Module 3 (518 genes)	1.4731	1.52147e-54
LINC01521	Module 3 (518 genes)	0.675467	1.6598e-21
CSNK1E	Module 3 (518 genes)	0.794314	2.10073e-16
TAX1BP3	Module 3 (518 genes)	0.780098	1.84221e-15
ZNF891	Module 3 (518 genes)	0.30572	0.000639204
RPL7P60	Module 3 (518 genes)	0.300768	6.91414e-09
AL390728.1	Module 3 (518 genes)	0.412941	3.43542e-13
EEF1A1P12	Module 3 (518 genes)	0.406936	1.49825e-09
RPSAP53	Module 3 (518 genes)	0.237636	3.94507e-07
RPS15AP1	Module 3 (518 genes)	0.566788	1.40896e-10
RPS19P1	Module 3 (518 genes)	1.13377	2.17706e-31
AC010468.1	Module 3 (518 genes)	0.209518	8.99329e-08
PPIAP29	Module 3 (518 genes)	0.206056	8.28485e-05
DNAJA1P3	Module 3 (518 genes)	0.237548	0.000288751
PKMP5	Module 3 (518 genes)	0.189442	1.25632e-05
RPL21P2	Module 3 (518 genes)	0.528256	2.31104e-09
YWHAZP6	Module 3 (518 genes)	0.643444	7.08446e-12
GPX1P2	Module 3 (518 genes)	0.244353	9.11329e-06
MIR99AHG	Module 3 (518 genes)	0.773874	2.91057e-15
TUBB2BP1	Module 3 (518 genes)	0.36913	1.25617e-06
RPL10P1	Module 3 (518 genes)	0.884614	2.87446e-33
AL139039.2	Module 3 (518 genes)	0.914699	6.00849e-33
RPS27AP11	Module 3 (518 genes)	0.799983	8.2225e-30
GAPDHP63	Module 3 (518 genes)	0.642248	8.18249e-21
AL033519.2	Module 3 (518 genes)	1.15405	8.13658e-33
FTH1P8	Module 3 (518 genes)	0.309618	3.17465e-09
HNRNPA1P12	Module 3 (518 genes)	0.261779	3.3957e-09
UBA52	Module 3 (518 genes)	0.819617	1.52283e-22
EEF1A1P24	Module 3 (518 genes)	0.717743	1.53139e-13
AL365436.1	Module 3 (518 genes)	0.630113	3.18424e-12
RPS27AP16	Module 3 (518 genes)	0.709156	4.21883e-13
PRPF38AP1	Module 3 (518 genes)	0.0837372	0.0238147
RPL21P107	Module 3 (518 genes)	0.426362	4.27193e-12
RPS2P1	Module 3 (518 genes)	0.455822	4.40061e-08
AL354740.1	Module 3 (518 genes)	1.49093	2.59024e-54
AC104843.1	Module 3 (518 genes)	0.392248	5.81936e-18
AL358942.1	Module 3 (518 genes)	0.0722406	0.0064894
AC010970.1	Module 3 (518 genes)	1.92625	3.3734e-107
CACYBPP1	Module 3 (518 genes)	0.0624773	0.0207595
AL606495.1	Module 3 (518 genes)	0.705857	7.52611e-31
TERF1P5	Module 3 (518 genes)	0.231201	0.000667469
RPS4XP2	Module 3 (518 genes)	0.0577082	0.00840907
DANCR	Module 3 (518 genes)	1.17459	1.34001e-36
PARP1P1	Module 3 (518 genes)	0.367336	2.72588e-15
SCAMP4	Module 3 (518 genes)	0.759619	7.7178e-15
AC096631.2	Module 3 (518 genes)	0.721444	1.91813e-13
RPL15P18	Module 3 (518 genes)	0.258316	6.7075e-08
RPL41	Module 3 (518 genes)	1.5416	2.33042e-70
AC092155.2	Module 3 (518 genes)	0.741345	1.2318e-15
HNRNPA1P53	Module 3 (518 genes)	0.196749	2.21487e-06
AL354868.1	Module 3 (518 genes)	0.225276	5.82235e-09
PAICSP5	Module 3 (518 genes)	0.153328	1.9049e-05
AL138899.2	Module 3 (518 genes)	0.306012	3.60773e-05
AL359704.1	Module 3 (518 genes)	0.614601	4.27598e-11
AL590640.2	Module 3 (518 genes)	1.45538	1.16346e-51
TFAMP1	Module 3 (518 genes)	0.293199	7.99962e-11
PA2G4P4	Module 3 (518 genes)	0.0918661	0.0635899
HMGB1P11	Module 3 (518 genes)	0.637871	1.47311e-12
ACTG1P14	Module 3 (518 genes)	0.843195	2.98162e-35
AC092171.2	Module 3 (518 genes)	0.245592	4.60038e-06
RPL31P2	Module 3 (518 genes)	0.391966	2.13083e-08
ACTG1P10	Module 3 (518 genes)	0.860385	4.07499e-30
NPM1P48	Module 3 (518 genes)	1.36307	1.64196e-49
LSM12P1	Module 3 (518 genes)	0.605391	7.62735e-10
FTH1P7	Module 3 (518 genes)	0.128935	0.000132581
RPL29P28	Module 3 (518 genes)	0.992003	1.85608e-36
RPS3AP25	Module 3 (518 genes)	1.87698	4.88176e-96
AL451081.2	Module 3 (518 genes)	0.420119	3.45614e-09
EEF1A1P14	Module 3 (518 genes)	0.267412	0.000229375
AC138356.2	Module 3 (518 genes)	0.444513	6.90788e-07
RPS24P13	Module 3 (518 genes)	0.278198	2.42297e-06
EEF1A1P6	Module 3 (518 genes)	1.46656	8.67652e-57
AL391839.2	Module 3 (518 genes)	0.531451	6.30574e-12
RPL7P44	Module 3 (518 genes)	1.09906	7.97747e-30
GAPDHP68	Module 3 (518 genes)	0.282136	4.31177e-12
RPS15AP40	Module 3 (518 genes)	0.90127	1.89721e-29
RPS28	Module 3 (518 genes)	1.13023	6.29753e-59
UQCRHL	Module 3 (518 genes)	0.345357	5.52195e-14
HSPA8P1	Module 3 (518 genes)	0.248833	2.54348e-07
JRK	Module 3 (518 genes)	0.56108	1.46629e-10
RPS3AP6	Module 3 (518 genes)	1.14374	2.88027e-35
TUBBP6	Module 3 (518 genes)	0.23735	0.00711539
RPSAP76	Module 3 (518 genes)	0.338136	3.43121e-10
AL365258.2	Module 3 (518 genes)	0.185894	0.000267192
H3F3AP4	Module 3 (518 genes)	1.56433	2.72068e-96
LDHAP2	Module 3 (518 genes)	1.01011	7.96323e-37
LINC01067	Module 3 (518 genes)	0.334676	7.88269e-06
HNRNPA1P57	Module 3 (518 genes)	0.51135	7.45813e-10
AC097523.2	Module 3 (518 genes)	0.183585	0.000253062
RPL36AP10	Module 3 (518 genes)	0.388287	1.29506e-16
AL391069.3	Module 3 (518 genes)	0.80867	3.96448e-17
AC104978.1	Module 3 (518 genes)	0.417713	1.75926e-14
TMEM250	Module 3 (518 genes)	0.575401	7.5577e-12
HMGN2P17	Module 3 (518 genes)	0.773016	1.98557e-17
RPL35AP35	Module 3 (518 genes)	0.398277	3.50989e-15
GET4	Module 3 (518 genes)	0.168815	0.0375168
RPL7P24	Module 3 (518 genes)	0.442619	2.18987e-11
RPL23AP75	Module 3 (518 genes)	0.303662	2.98916e-06
AC020917.1	Module 3 (518 genes)	0.354568	2.94216e-07
RPL29P2	Module 3 (518 genes)	0.741762	9.91527e-16
AC006539.1	Module 3 (518 genes)	0.828113	4.1417e-20
AC074276.1	Module 3 (518 genes)	0.375222	3.23586e-07
AC010469.2	Module 3 (518 genes)	0.730637	3.06561e-14
RPL14P3	Module 3 (518 genes)	0.266264	2.46595e-10
AC092597.1	Module 3 (518 genes)	0.569429	4.74734e-18
AK2P2	Module 3 (518 genes)	0.121915	0.000264956
RPL5P3	Module 3 (518 genes)	0.894213	1.32904e-20
RPL12P32	Module 3 (518 genes)	0.838563	2.25175e-19
AC090515.1	Module 3 (518 genes)	0.322514	0.000193081
RPL21P13	Module 3 (518 genes)	0.261148	0.000364121
AC115223.1	Module 3 (518 genes)	0.548114	1.5626e-13
RPL3P3	Module 3 (518 genes)	0.362775	2.50121e-16
RPS18P13	Module 3 (518 genes)	0.303667	2.13326e-12
HNRNPKP4	Module 3 (518 genes)	0.0912195	0.000547225
AL590396.1	Module 3 (518 genes)	0.189231	2.07675e-07
RPL17P33	Module 3 (518 genes)	1.05158	2.36667e-28
EIF4BP8	Module 3 (518 genes)	0.266652	3.48019e-05
AC125604.1	Module 3 (518 genes)	0.230568	8.73932e-06
EEF1A1P4	Module 3 (518 genes)	0.61697	2.98795e-17
SCAMP1-AS1	Module 3 (518 genes)	0.584419	6.06807e-12
GAPDHP60	Module 3 (518 genes)	0.243275	4.42398e-06
HMGN2P4	Module 3 (518 genes)	1.95079	1.41345e-95
HSPD1P5	Module 3 (518 genes)	0.638283	7.45849e-20
AC106872.7	Module 3 (518 genes)	0.0910861	4.64971e-05
CCT5P1	Module 3 (518 genes)	0.542026	4.51736e-11
AC105250.1	Module 3 (518 genes)	0.291664	1.26942e-09
HNRNPKP1	Module 3 (518 genes)	0.26183	5.53281e-07
HMGB3P15	Module 3 (518 genes)	0.0849197	0.0289348
HAUS1P1	Module 3 (518 genes)	0.21161	2.63349e-05
RPL7L1P13	Module 3 (518 genes)	0.23782	1.53821e-08
HNRNPA3P7	Module 3 (518 genes)	0.931014	2.65892e-23
CDH12P3	Module 3 (518 genes)	0.363194	3.0664e-06
ATXN7L3B	Module 3 (518 genes)	1.21183	8.52901e-36
PAICSP4	Module 3 (518 genes)	0.193504	0.00895351
CDH12P1	Module 3 (518 genes)	0.363194	3.0664e-06
AP003068.1	Module 3 (518 genes)	0.544859	3.39113e-11
AP000873.3	Module 3 (518 genes)	0.117296	0.104528
ATF4P4	Module 3 (518 genes)	0.433996	1.13792e-06
AL357673.1	Module 3 (518 genes)	0.0446244	0.313281
MTRNR2L1	Module 3 (518 genes)	2.62956	1.48643e-202
AP002383.4	Module 3 (518 genes)	0.288646	3.47986e-10
AC025257.1	Module 3 (518 genes)	1.2844	3.72689e-40
EIF4A1P4	Module 3 (518 genes)	1.43117	1.23768e-76
EEF1A1P17	Module 3 (518 genes)	1.13031	1.81269e-32
CUX1	Module 3 (518 genes)	0.556535	1.58524e-08
HSPE1P4	Module 3 (518 genes)	0.200986	3.26897e-06
AC087386.1	Module 3 (518 genes)	0.769455	1.09291e-19
PPIAP4	Module 3 (518 genes)	0.0906895	0.000286544
AL358334.2	Module 3 (518 genes)	0.473192	9.63975e-10
AC091544.3	Module 3 (518 genes)	0.0977939	0.000433676
BMS1P15	Module 3 (518 genes)	0.182638	1.24678e-06
AC105339.3	Module 3 (518 genes)	0.306875	1.02918e-05
RPL10P14	Module 3 (518 genes)	0.391308	1.52716e-08
AC138811.2	Module 3 (518 genes)	1.81838	6.38148e-83
PPIAP47	Module 3 (518 genes)	0.816118	5.87917e-27
HSPE1P5	Module 3 (518 genes)	0.250191	2.86228e-12
AC136944.4	Module 3 (518 genes)	0.480194	2.06495e-14
AC139530.1	Module 3 (518 genes)	0.57042	1.18976e-09
AC135178.2	Module 3 (518 genes)	0.59615	5.27819e-18
AL359922.1	Module 3 (518 genes)	0.613266	3.3745e-12
PPIAP54	Module 3 (518 genes)	0.457553	6.84334e-15
AGAP12P	Module 3 (518 genes)	0.240899	6.90809e-05
TUFMP1	Module 3 (518 genes)	0.101531	0.000941201
AKR1B1P7	Module 3 (518 genes)	0.437243	3.97266e-08
AC005775.1	Module 3 (518 genes)	0.44954	4.08597e-09
AC005262.1	Module 3 (518 genes)	0.128838	1.77741e-05
LINC02001	Module 3 (518 genes)	0.391422	7.25518e-05
AC006116.7	Module 3 (518 genes)	0.634933	5.27368e-13
AC024592.3	Module 3 (518 genes)	0.880828	1.12682e-21
AC124856.1	Module 3 (518 genes)	1.00159	1.03929e-24
EEF1A1P7	Module 3 (518 genes)	0.21791	4.98704e-08
AL031282.2	Module 3 (518 genes)	0.462392	2.4025e-09
AC010422.3	Module 3 (518 genes)	0.354457	4.53541e-06
AC116667.1	Module 3 (518 genes)	0.115436	0.00151728
PPIAL4E	Module 3 (518 genes)	0.180652	9.69864e-08
AC008494.3	Module 3 (518 genes)	0.179347	1.78453e-07
NFYC-AS1	Module 3 (518 genes)	0.353124	1.4033e-07
AC010655.3	Module 3 (518 genes)	0.274874	1.88274e-05
AL139393.2	Module 3 (518 genes)	0.141504	0.0130163
AL355488.1	Module 3 (518 genes)	0.115191	0.0624194
AC006480.2	Module 3 (518 genes)	0.568119	4.02605e-11
FRMD6-AS1	Module 3 (518 genes)	0.378631	1.70884e-07
HIST1H2BE	Module 3 (518 genes)	0.490799	3.44646e-10
AL117332.1	Module 3 (518 genes)	0.36711	2.54079e-07
HIST1H2BH	Module 3 (518 genes)	0.344808	0.00026981
AP001527.2	Module 3 (518 genes)	0.438545	5.76234e-10
FP236383.2	Module 3 (518 genes)	1.82841	1.2009e-97
FP671120.3	Module 3 (518 genes)	1.82841	1.2009e-97
FP236383.3	Module 3 (518 genes)	1.82841	1.2009e-97
ABALON	Module 3 (518 genes)	0.767652	2.13302e-22
FP671120.4	Module 3 (518 genes)	1.21276	4.46342e-56
AL139099.5	Module 3 (518 genes)	0.379939	3.24327e-10
AC092329.4	Module 3 (518 genes)	0.476492	9.03993e-07
DPM1	Module 4 (235 genes)	-0.614021	6.53861e-17
HSPB6	Module 4 (235 genes)	-0.100492	0.000319667
MDH1	Module 4 (235 genes)	-0.729109	2.56185e-26
MNAT1	Module 4 (235 genes)	-0.404857	2.5282e-06
HEXB	Module 4 (235 genes)	-0.785575	1.16401e-15
JKAMP	Module 4 (235 genes)	-0.610464	1.96554e-10
HEBP2	Module 4 (235 genes)	-0.993571	1.24159e-24
MTA3	Module 4 (235 genes)	-0.537935	4.71249e-08
GPBP1	Module 4 (235 genes)	-0.473903	7.31499e-10
DNTTIP2	Module 4 (235 genes)	-0.496378	7.48969e-11
DERL2	Module 4 (235 genes)	-0.533587	4.04823e-08
CLNS1A	Module 4 (235 genes)	-0.679388	1.5409e-22
REXO2	Module 4 (235 genes)	-0.425501	3.51676e-06
HSPB11	Module 4 (235 genes)	-0.791554	3.00286e-26
AK6	Module 4 (235 genes)	-0.973377	1.4647e-29
CHMP5	Module 4 (235 genes)	-0.654121	5.3277e-17
SCFD1	Module 4 (235 genes)	-0.369499	7.29338e-06
RAB18	Module 4 (235 genes)	-0.831991	2.07035e-17
FKBP3	Module 4 (235 genes)	-0.293553	0.000241709
VTI1B	Module 4 (235 genes)	-0.578637	1.09922e-12
EPPIN	Module 4 (235 genes)	-0.352236	6.50098e-11
VAPA	Module 4 (235 genes)	-0.532352	2.2811e-13
ANKRD12	Module 4 (235 genes)	-0.560803	2.06313e-09
MEFV	Module 4 (235 genes)	-0.454843	9.75947e-13
STK3	Module 4 (235 genes)	-0.785209	1.20038e-15
RAB2A	Module 4 (235 genes)	-0.237803	0.00573567
EMC2	Module 4 (235 genes)	-0.833912	1.75209e-17
URI1	Module 4 (235 genes)	-0.43501	1.018e-05
SSBP1	Module 4 (235 genes)	-0.955908	6.83232e-35
LSM5	Module 4 (235 genes)	-1.16493	1.33288e-54
PSMA2	Module 4 (235 genes)	-0.971367	1.15136e-48
GALNTL5	Module 4 (235 genes)	-0.125163	0.000237389
FRG1	Module 4 (235 genes)	-0.614144	6.62462e-11
C11orf58	Module 4 (235 genes)	-0.582936	1.80539e-12
FRK	Module 4 (235 genes)	-1.16624	7.54648e-39
COX7A2	Module 4 (235 genes)	-1.93611	4.14484e-111
BRIX1	Module 4 (235 genes)	-0.946866	4.11913e-40
ATP6V0E1	Module 4 (235 genes)	-0.373212	3.474e-08
SELENOK	Module 4 (235 genes)	-1.19742	2.08964e-60
TIMMDC1	Module 4 (235 genes)	-0.508032	1.71515e-09
PSMD14	Module 4 (235 genes)	-0.821193	1.02522e-27
FANCL	Module 4 (235 genes)	-0.711282	1.17114e-17
COX7A2L	Module 4 (235 genes)	-0.371174	6.27133e-07
RCN2	Module 4 (235 genes)	-0.845774	7.63447e-33
SPCS2	Module 4 (235 genes)	-0.350531	4.23647e-06
UCHL3	Module 4 (235 genes)	-0.746542	1.71635e-19
EXOSC8	Module 4 (235 genes)	-1.24424	3.60437e-83
PAIP2	Module 4 (235 genes)	-0.327556	1.37135e-06
ADRA1A	Module 4 (235 genes)	-0.30412	5.17193e-08
NDUFAF4	Module 4 (235 genes)	-0.464432	2.72438e-08
GLO1	Module 4 (235 genes)	-1.0017	3.55665e-35
THOC2	Module 4 (235 genes)	-0.673647	6.01973e-19
EIF2S2	Module 4 (235 genes)	-1.24904	2.33784e-46
UBA2	Module 4 (235 genes)	-0.64915	3.626e-16
KTN1	Module 4 (235 genes)	-0.193499	0.0233083
RAP1B	Module 4 (235 genes)	-0.592373	3.64399e-14
PSMA1	Module 4 (235 genes)	-0.8607	1.08512e-28
NGDN	Module 4 (235 genes)	-0.530829	8.15425e-10
EAPP	Module 4 (235 genes)	-0.41253	2.68718e-05
ITFG1	Module 4 (235 genes)	-0.918172	6.22803e-21
UBE2M	Module 4 (235 genes)	-1.03677	5.3299e-28
NOL11	Module 4 (235 genes)	-0.593407	1.7537e-11
COX7B	Module 4 (235 genes)	-0.923868	1.00815e-25
ACTR10	Module 4 (235 genes)	-0.598487	8.82337e-11
TMEM128	Module 4 (235 genes)	-0.679318	4.78525e-12
MORC4	Module 4 (235 genes)	-1.41455	1.43542e-56
SARAF	Module 4 (235 genes)	-0.36988	5.35769e-05
IER3IP1	Module 4 (235 genes)	-1.05049	1.62776e-37
CCNH	Module 4 (235 genes)	-0.598528	1.18595e-09
BTF3L4	Module 4 (235 genes)	-0.616985	3.72133e-19
MPHOSPH6	Module 4 (235 genes)	-0.521487	1.19242e-07
MRPL50	Module 4 (235 genes)	-0.59448	2.82605e-13
TMEM14B	Module 4 (235 genes)	-0.691081	1.52472e-24
CCDC90B	Module 4 (235 genes)	-0.476623	1.23858e-08
DCUN1D5	Module 4 (235 genes)	-0.240971	0.0146942
DYNC2LI1	Module 4 (235 genes)	-0.528185	8.22345e-08
METTL5	Module 4 (235 genes)	-0.778324	1.02447e-25
SSB	Module 4 (235 genes)	-0.454301	1.15163e-07
ESD	Module 4 (235 genes)	-0.778166	5.52298e-32
GTF2A2	Module 4 (235 genes)	-0.976382	3.28496e-42
ETFA	Module 4 (235 genes)	-0.29956	2.08052e-06
SCAPER	Module 4 (235 genes)	-0.970927	2.68797e-23
MAP1LC3B	Module 4 (235 genes)	-0.456757	2.57794e-08
SOD1	Module 4 (235 genes)	-0.573935	2.5307e-11
ITGB3BP	Module 4 (235 genes)	-1.54618	6.5658e-70
MTF2	Module 4 (235 genes)	-0.757017	1.39475e-20
CALM2	Module 4 (235 genes)	-1.94321	4.92229e-110
UBA3	Module 4 (235 genes)	-0.453144	3.80703e-07
COMMD10	Module 4 (235 genes)	-0.689354	1.99904e-12
BOD1	Module 4 (235 genes)	-0.702488	1.14999e-13
RARS2	Module 4 (235 genes)	-0.491416	6.14483e-07
DYNLT1	Module 4 (235 genes)	-0.727618	8.56203e-26
RBMX	Module 4 (235 genes)	-1.31416	4.51265e-63
CBWD5	Module 4 (235 genes)	-0.364298	9.76796e-06
ASTN2	Module 4 (235 genes)	-0.676778	3.99206e-15
SAP18	Module 4 (235 genes)	-1.1818	5.83529e-45
THYN1	Module 4 (235 genes)	-0.4691	2.67506e-12
KCNE4	Module 4 (235 genes)	-0.650056	2.31283e-12
GGPS1	Module 4 (235 genes)	-0.493604	5.47302e-07
CETN3	Module 4 (235 genes)	-1.41089	8.81078e-54
UQCRB	Module 4 (235 genes)	-0.625751	8.78186e-15
EIF4A2	Module 4 (235 genes)	-0.844449	5.17334e-33
DPY30	Module 4 (235 genes)	-0.643264	2.56616e-23
MRPS18C	Module 4 (235 genes)	-0.594817	3.31822e-14
NDUFAF2	Module 4 (235 genes)	-0.750168	8.66442e-18
NDUFS4	Module 4 (235 genes)	-0.545867	8.79855e-16
DCAF13	Module 4 (235 genes)	-0.6256	5.85986e-18
VDAC2	Module 4 (235 genes)	-0.737427	5.32945e-28
ISCA2	Module 4 (235 genes)	-0.703449	8.0966e-15
CYB5A	Module 4 (235 genes)	-0.897817	4.5669e-20
SNRPD1	Module 4 (235 genes)	-1.92878	2.16978e-123
FNTA	Module 4 (235 genes)	-0.561692	7.68719e-12
NFU1	Module 4 (235 genes)	-0.509918	2.27279e-07
NUDCD2	Module 4 (235 genes)	-0.545096	5.11808e-09
TMEM126B	Module 4 (235 genes)	-0.453732	4.17995e-06
OR1A1	Module 4 (235 genes)	-1.05253	1.23671e-28
PAIP1	Module 4 (235 genes)	-0.307863	0.000283009
OR5A1	Module 4 (235 genes)	-0.306258	3.12218e-07
NAA20	Module 4 (235 genes)	-0.640862	7.66018e-12
CCDC36	Module 4 (235 genes)	-0.343001	6.10757e-09
AC013489.1	Module 4 (235 genes)	-0.284874	1.2061e-07
USMG5	Module 4 (235 genes)	-0.664031	5.07805e-20
TMEM167A	Module 4 (235 genes)	-0.606309	6.68266e-14
MRPS22	Module 4 (235 genes)	-0.553629	1.65626e-08
DENND2C	Module 4 (235 genes)	-0.155737	2.77556e-07
C8orf59	Module 4 (235 genes)	-0.296135	4.8647e-05
CHD9	Module 4 (235 genes)	-0.57085	6.48229e-14
OR2T12	Module 4 (235 genes)	-0.413996	2.82236e-09
FLJ40194	Module 4 (235 genes)	-0.174727	5.98441e-06
C18orf32	Module 4 (235 genes)	-0.436879	5.34282e-07
AP3S1	Module 4 (235 genes)	-0.547431	1.40041e-11
UBE2N	Module 4 (235 genes)	-0.992591	4.76363e-43
TCEAL8	Module 4 (235 genes)	-0.684342	8.31609e-18
HIGD1A	Module 4 (235 genes)	-0.62622	1.83421e-20
PHLDA2	Module 4 (235 genes)	-0.215528	3.32691e-08
SLC25A18	Module 4 (235 genes)	-0.190686	5.05056e-05
SELENOF	Module 4 (235 genes)	-0.481239	1.1186e-12
TMEM50A	Module 4 (235 genes)	-0.327871	8.45211e-06
CMSS1	Module 4 (235 genes)	-1.1889	4.92408e-36
SLC36A2	Module 4 (235 genes)	-0.105294	0.00112607
CMC1	Module 4 (235 genes)	-0.544285	3.26189e-08
COMMD6	Module 4 (235 genes)	-0.839812	3.64882e-26
H3F3C	Module 4 (235 genes)	-1.11289	1.4359e-31
CFAP54	Module 4 (235 genes)	-1.00646	1.34334e-26
SUMO2	Module 4 (235 genes)	-1.34531	7.20777e-56
Metazoa_SRP	Module 4 (235 genes)	-0.50961	5.39145e-10
AMZ2	Module 4 (235 genes)	-0.667496	5.3705e-13
CD47	Module 4 (235 genes)	-1.06171	1.25862e-27
MRPL42	Module 4 (235 genes)	-0.912715	8.00757e-41
B3GNT6	Module 4 (235 genes)	-0.0770145	0.0184549
OSTC	Module 4 (235 genes)	-0.878259	2.2097e-33
CAPZA2	Module 4 (235 genes)	-0.789076	6.75658e-28
NBDY	Module 4 (235 genes)	-0.832113	1.5491e-27
AL163540.1	Module 4 (235 genes)	-0.454078	1.57605e-13
SNX2	Module 4 (235 genes)	-0.86253	6.80116e-34
HTN3	Module 4 (235 genes)	-0.118718	0.000185563
CRYZL1	Module 4 (235 genes)	-0.519089	8.18095e-10
RPL5P8	Module 4 (235 genes)	-1.49471	2.30235e-55
ARHGAP27P1-BPTFP1-KPNA2P3	Module 4 (235 genes)	-1.25617	9.2509e-56
RPL21P65	Module 4 (235 genes)	-0.108165	0.000498315
SNORA81	Module 4 (235 genes)	-0.101241	0.000226599
RABGAP1L-IT1	Module 4 (235 genes)	-0.98924	5.25645e-25
HMGB1P9	Module 4 (235 genes)	-0.721377	3.04466e-16
PDSS1P2	Module 4 (235 genes)	-0.152928	3.54163e-08
AL355482.1	Module 4 (235 genes)	-0.339192	3.65209e-08
RPS6P20	Module 4 (235 genes)	-0.289767	9.32698e-07
RPL10AP6	Module 4 (235 genes)	-0.280195	1.81269e-06
NACAP1	Module 4 (235 genes)	-0.714677	6.52274e-16
AC005000.1	Module 4 (235 genes)	-0.203275	6.79022e-07
FAM207BP	Module 4 (235 genes)	-0.0849135	1.94663e-05
AC105053.1	Module 4 (235 genes)	-0.358225	3.82677e-10
PET100	Module 4 (235 genes)	-0.891708	2.7286e-25
AC004039.1	Module 4 (235 genes)	-0.807556	4.16949e-17
GAPDHP64	Module 4 (235 genes)	-1.88744	1.59635e-89
LINC01697	Module 4 (235 genes)	-0.120467	0.00477619
FTH1P1	Module 4 (235 genes)	-0.874552	1.34073e-19
EEF1B2P3	Module 4 (235 genes)	-0.912156	1.13536e-27
EIF4EP1	Module 4 (235 genes)	-0.384405	1.48941e-10
PINLYP	Module 4 (235 genes)	-0.5685	9.02869e-12
FAM133B	Module 4 (235 genes)	-0.574828	2.09544e-11
RPL39P3	Module 4 (235 genes)	-1.25208	2.05564e-39
LDHAP7	Module 4 (235 genes)	-0.834374	3.74719e-29
LINC01814	Module 4 (235 genes)	-1.11518	3.90465e-33
EIF1AXP1	Module 4 (235 genes)	-1.15079	1.4145e-32
BCYRN1	Module 4 (235 genes)	-0.245773	6.78385e-06
LINC01358	Module 4 (235 genes)	-0.271222	4.7184e-05
AL365204.2	Module 4 (235 genes)	-0.419103	2.6756e-07
ACTG1P19	Module 4 (235 genes)	-0.0556509	0.0876415
RPL21P42	Module 4 (235 genes)	-0.192244	3.83789e-08
AC034238.1	Module 4 (235 genes)	-0.229338	2.96051e-06
LACTB2-AS1	Module 4 (235 genes)	-0.260671	0.000384189
AL139147.1	Module 4 (235 genes)	-0.713014	4.99026e-14
OR7E94P	Module 4 (235 genes)	-0.180632	0.000803922
PSMC1P5	Module 4 (235 genes)	-0.294964	2.08943e-05
AC012349.1	Module 4 (235 genes)	-0.628117	1.74704e-12
AC067930.2	Module 4 (235 genes)	-0.0837665	0.0191853
AP001267.1	Module 4 (235 genes)	-0.631787	9.72729e-11
AC005833.2	Module 4 (235 genes)	-1.08942	1.81744e-30
AC005255.1	Module 4 (235 genes)	-0.393124	6.0966e-13
MTRNR2L3	Module 4 (235 genes)	-2.11901	3.19662e-118
AC011773.3	Module 4 (235 genes)	-0.194876	6.05939e-06
CHURC1	Module 4 (235 genes)	-1.00774	4.3538e-34
AL136038.2	Module 4 (235 genes)	-0.253774	4.17543e-09
AL136298.3	Module 4 (235 genes)	-0.911986	2.6148e-25
AC087473.1	Module 4 (235 genes)	-1.40294	2.58659e-56
AC093536.1	Module 4 (235 genes)	-0.193932	1.02321e-06
AC145207.3	Module 4 (235 genes)	-0.418503	1.39434e-07
AC006435.2	Module 4 (235 genes)	-0.100517	0.0264703
RN7SL4P	Module 4 (235 genes)	-0.0322293	0.256336
RN7SL121P	Module 4 (235 genes)	-0.27985	3.22574e-08
RN7SL718P	Module 4 (235 genes)	-0.254897	5.99765e-05
RN7SL525P	Module 4 (235 genes)	-0.0674161	0.0246062
RN7SL811P	Module 4 (235 genes)	-0.43061	1.38033e-09
RN7SL524P	Module 4 (235 genes)	-0.0408928	0.27307
AC092069.1	Module 4 (235 genes)	-0.241095	1.36217e-06
AC011444.4	Module 4 (235 genes)	-0.293772	2.78056e-11
AC008395.1	Module 4 (235 genes)	-0.182987	1.14887e-05
DDIT4-AS1	Module 4 (235 genes)	-0.451123	3.04618e-12
AC103724.4	Module 4 (235 genes)	-0.0820058	0.000327901
TP53TG1_1	Module 4 (235 genes)	-0.116528	0.00121173
RNA5-8SN4	Module 4 (235 genes)	-0.902885	4.31735e-24
Metazoa_SRP.62	Module 4 (235 genes)	-0.235359	2.34411e-05
AC092747.4	Module 4 (235 genes)	-0.524579	2.63861e-10
U2AF1L5	Module 4 (235 genes)	-0.987007	5.07053e-42
Metazoa_SRP.77	Module 4 (235 genes)	-0.127759	0.0081732
DLEU1_1	Module 4 (235 genes)	-0.542744	4.63941e-13
RNA5-8SN5	Module 4 (235 genes)	-0.902885	4.31735e-24
GOLGA6L22	Module 4 (235 genes)	-0.183288	0.00041301
RNA5-8S4	Module 4 (235 genes)	-0.902885	4.31735e-24
RNA5-8S4.1	Module 4 (235 genes)	-0.902885	4.31735e-24
AP000432.2	Module 4 (235 genes)	-0.396182	3.44516e-08
AC131649.2	Module 4 (235 genes)	-1.03481	2.59879e-29
AC040160.2	Module 4 (235 genes)	-0.26407	1.73843e-05
AC092184.1	Module 4 (235 genes)	-0.838098	1.5757e-21
LINC00891	Module 4 (235 genes)	-0.353285	1.29548e-08
